1 **The transcriptional correlates of divergent electric organ discharges in *Paramormyrops***  
2 **electric fish**

3

4 Mauricio Losilla and Jason R. Gallant\*

5 Department of Integrative Biology, Michigan State University, East Lansing, MI 48824, USA.

6 Graduate Program in Ecology, Evolutionary Biology and Behavior, Michigan State University,  
7 East Lansing, MI 48824, USA.

8 BEACON Center for the Study of Evolution in Action, Michigan State University, East Lansing,  
9 MI 48824, USA.

10

11 \*Author to whom correspondence should be addressed: [jgallant@msu.edu](mailto:jgallant@msu.edu)

12 **Abstract**

13 Background: Understanding the genomic basis of phenotypic diversity can be greatly facilitated  
14 by examining adaptive radiations with hypervariable traits. In this study, we focus on a rapidly  
15 diverged species group of mormyrid electric fish in the genus *Paramormyrops*, which are  
16 characterized by extensive phenotypic variation in electric organ discharges (EODs). The main  
17 components of EOD diversity are waveform duration, complexity and polarity. Using an RNA-  
18 sequencing based approach, we sought to identify gene expression correlates for each of these  
19 EOD waveform features by comparing 11 specimens of *Paramormyrops* that exhibit variation in  
20 these features.

21 Results: Patterns of gene expression among *Paramormyrops* are highly correlated, and 3,274  
22 genes (16%) were differentially expressed. Using our most restrictive criteria, we detected 71-

23 144 differentially expressed genes correlated with each EOD feature, with little overlap between  
24 them. The predicted functions of several of these genes are related to extracellular matrix, cation  
25 homeostasis, lipid metabolism, and cytoskeletal and sarcomeric proteins. These genes are of  
26 significant interest given the known morphological differences between electric organs that  
27 underlie differences in the EOD waveform features studied.

28 Conclusions: In this study, we identified plausible candidate genes that may contribute to  
29 phenotypic differences in EOD waveforms among a rapidly diverged group of mormyrid electric  
30 fish. These genes may be important targets of selection in the evolution of species-specific  
31 differences in mate-recognition signals.

## 32 **Introduction**

33           Understanding the genomic basis of phenotypic diversity is a major goal of evolutionary  
34 biology [1]. Adaptive radiations and explosive diversification of species [2] are frequently  
35 characterized by interspecific phenotypic differences in divergence of few, hypervariable  
36 phenotypic traits [3–6]. Such systems offer exceptional advantages to study the genomic bases of  
37 phenotypic diversity: they can provide replication under a controlled phylogenetic framework  
38 [7], and couple ample phenotypic differentiation with relatively “clean” genomic signals between  
39 recently diverged species [8]. Study of the genomic mechanisms underlying hypervariable  
40 phenotypic traits has identified, in some cases relatively simple genetic architectures [9–13].  
41 More often, the genetic architecture underlying such traits can be complex and polygenic [14–  
42 17]. It has long been recognized that changes in gene expression can affect phenotypic  
43 differences between species [18], and RNA-seq based approaches have greatly facilitated the  
44 study of this relationship [19]. A growing number of studies have examined differences in gene  
45 expression in phenotypic evolution (e.g., [19–27]). While these studies do not implicate  
46 mutational causes, analysis of differential gene expression (DGE) can be a useful approach in  
47 examining the genomic basis of divergent phenotypes.

48           African weakly electric fish (Teleostei: Mormyridae) are among the most rapidly  
49 speciating groups of ray-finned fishes [28,29]. This is partly due to the diversification of the  
50 genus *Paramormyrops* [30,31] in the watersheds of West-Central Africa, where more than 20  
51 estimated species [32] have evolved within the last 0.5-2 million years [30]. Extensive evidence  
52 has demonstrated that electric organ discharges (EODs) exhibit little intraspecific variation, yet  
53 differ substantially among mormyrid species [33–35]. This pattern is particularly evident in

54 *Paramormyrops* [30,36], in which EOD waveforms evolve much faster than morphology, size,  
55 and trophic ecology [37].

56 Mormyrid EODs are a behavior with a dual role in electrolocation [38,39] and  
57 intraspecific communication [40,41]. EOD waveforms vary between species principally in terms  
58 of their complexity, polarity, and duration [30,42], and all three dimensions of variation are  
59 evident among *Paramormyrops* (Fig. 1). Furthermore, recent discoveries of intraspecific  
60 polymorphism in EOD waveform in *P. kingsleyae* [43] and polarity among *P. sp.* ‘magnostipes’  
61 [35] present a unique opportunity to study the genomic basis of phenotypic traits within a rapidly  
62 diverging species group.

63 EODs have a well-understood morphological (Fig. 1) and neurophysiological basis  
64 [44,45]. EODs are generated by specialized cells (electrocytes) that constitute the electric organ  
65 (EO), located in the caudal peduncle [46]. Mormyrid EOs are comprised of 80-360 electrocytes  
66 [34], and an individual EOD is produced when the electrocytes discharge synchronously. EODs  
67 are multiphasic because they result from action potentials produced by two excitable membranes:  
68 the two large phases of the EOD, called P1 and P2, are produced by spikes generated by the  
69 posterior and anterior electrocyte faces, respectively [47]. There is a relationship between EODs  
70 of longer duration and increased surface membrane area [48], likely mediated at least in part by  
71 an increase in membrane capacitance [49,50]. The duration of EODs is highly variable within  
72 mormyrids-- some EODs are extremely long (>15 ms) and others are very brief (0.2 ms) [32].

73 Within the Mormyridae, triphasic EODs evolved early from biphasic EODs; however,  
74 there have been multiple parallel reversions to biphasic EODs across mormyrids and within  
75 *Paramormyrops* [36,43]. Triphasic (P0-present) EODs are produced by electrocytes that are

76 innervated on the anterior face and have penetrating stalks (*Pa*, P-type), whereas biphasic (P0-  
77 absent) EODs are produced by electrocytes innervated on the posterior face and lack penetrating  
78 stalks (*NPp*, N-type) (for more details see [42,43,47,48,51,52]). We refer to triphasic EODs as  
79 more ‘complex’ than biphasic EODs. In some cases, triphasic EODs display an unusually large  
80 P0 phase, which gives the appearance of an ‘inverted’ polarity. This is exemplified by the type I  
81 EODs of *P. sp.* ‘magnostipes’ (Fig. 1) [35]. The number [47] and diameter [34,43] of stalk  
82 penetrations are positively correlated with the magnitude of P0. We refer to individuals with  
83 large penetrations as ‘inverted’ polarity and individuals with small penetrations as ‘normal’  
84 polarity.

85         Recent studies in mormyrids [53–57] have adopted a candidate gene approach to examine  
86 the molecular basis of variation in EOD duration on macroevolutionary scales, implicating  
87 voltage gated sodium channels (e.g. *scn4aa*) and potassium channels (e.g. *kcna7a*) as key targets  
88 of selection during EOD evolution. Beyond this recent attention to ion channels, several studies  
89 have described the importance of structural differences between EOs as an important component  
90 of EOD variation [43,48,50]. In this study, we took a transcriptome-wide approach to  
91 characterizing the molecular basis of electric signal diversity in *Paramormyrops* species  
92 divergent for EOD complexity, duration and polarity. We used RNA-sequencing to  
93 comprehensively examine DGE in the adult EOs of five *Paramormyrops* operational taxonomic  
94 units (OTUs), leveraging a recently sequenced and annotated genome assembly from the species  
95 *P. kingsleyae* (N-type) [58], and identify gene expression correlates of each of the three main  
96 EOD waveform features of electric signal diversity in *Paramormyrops*. Our results emphasize  
97 genes that influence the shape and structure of the electrocyte cytoskeleton, membrane and

98 extracellular matrix (ECM) to exhibit predictable differences between *Paramormyrops* species  
99 with divergent EOD phenotypes.

## 100 **Methods**

### 101 *Sample collection*

102 We captured 11 *Paramormyrops* individuals from Gabon, West Central Africa in 2009:  
103 five *P. kingsleyae* (n=3 N-type and n=2 P-type), four *P. sp.* ‘magnostipes’ (n=2 Type I and n=2  
104 Type II), and two *P. sp.* ‘SN3’. Within 1-12 hours of capture, individual specimens were  
105 euthanized by overdose with MS-222. The caudal peduncle was excised and skinned, and  
106 immediately immersed in RNA-later for 24h at 4°C, before being transferred to -20°C for long-  
107 term storage. As two of these species (*P. sp.* ‘magnostipes’, *P. sp.* ‘SN3’) are presently  
108 undescribed, we note that these specimens were identified by their EOD waveform, head  
109 morphology and collecting locality [30,31,35,59]. All specimens, including vouchers materials,  
110 are deposited in the Cornell University Museum of Vertebrates. Collection information and the  
111 phenotypes per EOD feature of each sample are detailed in Table 1.

### 112 *RNA extraction, cDNA library preparation and Illumina Sequencing*

113 Total RNA was extracted from EOs using RNA-easy Kit (Qiagen, Inc) after  
114 homogenization with a bead-beater (Biospec, Inc.) in homogenization buffer. mRNA was  
115 isolated from total RNA using a NEBNext mRNA Isolation Kit (New England Biolabs, Inc.).  
116 Libraries for RNA-seq were prepared using the NEBNext mRNA Sample Prep Master Mix Set,  
117 following manufacturer’s instructions. Final libraries after size selection ranged from 250-367  
118 bp. Libraries were pooled and sequenced by the Cornell University Biotechnology Resource  
119 Center Genomics Core on an Illumina HiSeq 2000 in a 2x100bp paired end format. Raw  
120 sequence reads were deposited in the NCBI SRA (Supplemental File 1).

121 *Read processing and data exploration*

122 FastQC v0.11.3 (Babraham Bioinformatics) was used to manually inspect raw and  
123 processed reads. We used Trimmomatic v.0.32 [60] to remove library adaptors, low quality  
124 reads, and filter small reads; following the suggested settings of MacManes [61]: 2:30:10  
125 SLIDINGWINDOW:4:5 LEADING:5 TRAILING:5 MINLEN:25. After trimming, reads from  
126 each specimen were aligned to the predicted transcripts of the NCBI-annotated (Release 100) *P.*  
127 *kingsleyae* (N-type) genome [58] using bowtie 2 v2.3.4.1 [62]. Expression quantification was  
128 estimated at the gene level using RSEM v1.3.0 [63], followed by exploration of the data with a  
129 gene expression correlation matrix based on Euclidean distances and Pearson's correlation  
130 coefficient (for genes with read counts >10, Trinity's default parameters). All these steps were  
131 executed using scripts included with Trinity v2.6.6 [64,65].

132 *Data Analysis*

133 We began by examining DGE between all possible pairwise comparisons of OTUs ( $n =$   
134 10, Table 2) using edgeR v3.20.9 [66] through a script provided with Trinity. We restricted our  
135 consideration of genes to those where CPM-transformed counts were  $> 1$  in at least two samples  
136 for each comparison (edgeR default parameters). We modified this to use the function  
137 `estimateDisp()` instead of the functions `estimateCommonDisp()` and `estimateTagwiseDisp()`. For  
138 each comparison, we conservatively considered genes to be differentially expressed with a  
139 minimum fold change of 4 and p-value of 0.001 after FDR correction. We compiled a non-  
140 redundant list of genes that were differentially expressed in at least one comparison based on  
141 these criteria (Fig. 2, Set A).

142 For each of the differentially expressed genes (DEGs) in Set A, we TMM normalized,  
143  $\log_2(\text{TMM} + 1)$  transformed, and mean-centered their expression values. We used the

144 transformed values to compare gene expression between groups of OTUs with alternative EOD  
145 waveform phenotypes (i.e. *long duration EOD* vs. *short duration EOD*, *biphasic* vs. *triphasic*  
146 and *small penetrations* vs. *large penetrations*, see Table 1. Note that waveform polarity  
147 phenotypes only apply to triphasic individuals). For each of the three phenotype pairs, we  
148 extracted the genes that were on average more than four times more highly expressed in one  
149 phenotype than the other. This resulted in six lists of upregulated genes, one for each EOD  
150 feature across all OTUs and samples (Fig. 2, Set B).

151 In order to assess enrichment of particular gene pathways, biological functions, and  
152 cellular locations using a controlled vocabulary, we performed Gene Ontology (GO) [67,68]  
153 enrichment tests on every list of upregulated genes from (1) the ten pairwise comparisons (n=20,  
154 two per comparison) and (2) Set B (n=6), for each of the three ontology domains: Biological  
155 Process, Cellular Component, and Molecular Function. First, we identified homologous proteins  
156 predicted from the *P. kingsleyae* (N-type) reference genome and those predicted from *Danio*  
157 *rerio* (GRCz11) by blastp (BLAST+ v2.6, [69]). For each protein, the top hit (e-value  $\leq 1e-10$ )  
158 was used for annotation. Next, we used mygene v1.14.0 [70,71] to match the *D. rerio* proteins to  
159 *D. rerio* genes and extract their GO annotations (zebrafish Zv9). This resulted in GO annotations  
160 for each of the three ontology domains for *P. kingsleyae* (N-type) genes. Finally, we carried out  
161 the GO enrichment tests using topGO v2.30.1 [72] and the following parameters: nodeSize = 10,  
162 statistic = fisher, algorithm = weight01, p-value  $\leq 0.02$ . The ‘universe’ for each enrichment test  
163 on gene lists from the pairwise comparisons was all the genes deemed expressed in the  
164 respective comparison, whereas the non-redundant list of genes in these ten ‘universes’ was the  
165 ‘universe’ for all enrichment tests on the gene lists from Set B.



166 Interpretation of lists of genes from Set A and Set B each suffered limitations for the  
167 overall goals of this analysis, which is to identify the DEGs most strongly associated with each  
168 waveform feature (duration, complexity, and polarity). The ten comparisons made to construct  
169 Set A were not equally informative for two primary reasons: (1) the OTUs in this analysis vary  
170 in terms of their phylogenetic relatedness (see [30,31]) and (2) several OTU comparisons varied  
171 in more than one waveform characteristic (Table 2). As such, we elected to focus on the most  
172 informative comparison for each EOD feature: the comparison that contrasted only the given  
173 feature and that minimized phylogenetic distance between OTUs. Of the ten pairwise  
174 comparisons, we classified three as the most informative comparisons, one per EOD feature  
175 (Table 2). The six lists of upregulated genes from these three comparisons constitute Set A'.

176 Comparisons in Set A'; however, lack biological replication. In contrast, interpretations  
177 of Set B were potentially limited in that many of the OTUs in this analysis differed in more than  
178 one EOD feature. To circumvent the limitations of Sets A' and B within the limits of our study  
179 design, we constructed a third set (Set C). Set C is defined as the intersection of the upregulated  
180 genes and their enriched GO terms from Sets A' and B, for each phenotype. Since there were six  
181 phenotypes in our study, Set C encompasses six lists of upregulated genes and their respective  
182 enriched GO terms (Fig. 2). Therefore, Set C represents the DEGs that are (1) differentially  
183 expressed between closely-related OTUs that vary in a single waveform characteristic, and (2)  
184 are consistently differentially expressed among all OTUs that share that waveform feature. We  
185 focus our attention on Set C: We retrieved GO term definitions from QuickGO [73] and  
186 descriptions of gene function of the functional annotations from UniProt [74]; and to facilitate  
187 the discussion, we classified the more interesting genes in Set C into "general" functional

188 classes, or themes. All source code necessary to perform the methods described here is provided  
189 in a GitHub repository: [http://github.com/msuefishlab/paramormyrops\\_rnaseq](http://github.com/msuefishlab/paramormyrops_rnaseq).

## 190 **Results**

### 191 *Overall Results*

192 Overall alignment rates to the *Paramormyrops kingsleyae* reference transcriptome ranged  
193 from 28-74% (>375 million sequenced reads in total, 50% aligned), with no clear differences  
194 among OTUs (Supplemental File 1). On inspection, we concluded that these rates are a  
195 consequence of the presence of overrepresented sequences from rRNA, mtDNA and bacterial  
196 contamination in the RNA-seq reads.

197 Fig. 3 shows a heatmap of pairwise correlations of gene expression for 24,960 genes  
198 across all 11 samples. Our ten DGE comparisons detected a range of 16,420-19,273 expressed  
199 genes. Intersection of these lists resulted in a non-redundant list of 20,197 genes expressed in EO  
200 across all DGE comparisons. We found that 3,274 (16%) were differentially expressed in at least  
201 one comparison, and expression patterns across all OTUs were highly correlated (Pearson's  $r >$   
202 0.89, Fig. 3). Despite this, correlation values were higher among recognized OTUs, except for  
203 the *P. sp.* 'magnostipes type II' 6768 sample (Fig. 3). Thus, we excluded comparisons with the  
204 *P. sp.* 'magnostipes type II' OTU from the informative comparisons for Set A'.

### 205 *Set A: Differential Expression Analysis*

206 We found between 489-1542 DEGs (50-128 enriched GO terms) in every comparison  
207 except *P. sp.* 'magnostipes type I' vs *P. sp.* 'magnostipes type II', which had only nine DEGs  
208 with seven enriched GO terms (Table 2). Supplemental File 2 provides a tabular list of DEGs for

209 each comparison, and Supplemental File 3 provides a tabular list of enriched GO terms for each  
210 comparison.

211 We chose the phylogenetically most informative comparisons (see methods) to construct  
212 Set A', which are indicated in Table 2. We found: 507 DEG and 69 enriched GO terms  
213 comparing *P. kingsleyae* (N-type) vs *P. sp.* 'SN3' (EOD duration); 1322 DEG and 77 enriched  
214 GO terms comparing *P. kingsleyae* (P-type) vs *P. sp.* 'magnostipes type I' (waveform polarity);  
215 and 530 DEG and 75 enriched GO terms comparing *P. kingsleyae* (N-type) vs *P. kingsleyae* (P-  
216 type) (waveform complexity).

#### 217 *Set B: Expression Based Clustering*

218 For each EOD feature (n=3), we grouped OTUs by phenotype (Table 1), and calculated  
219 normalized expression values for Set A genes (n = 3,274). For each EOD feature, we selected  
220 genes exhibiting a greater than four-fold difference in averaged, normalized expression between  
221 phenotypes to construct Set B. The expression profiles of the genes in the clusters for each EOD  
222 feature, along with the enriched GO terms for Biological Process and Cellular Component, are  
223 shown in Figs. 4-6. Supplemental File 4 lists the identities of these DEG and Supplemental File 5  
224 lists their enriched GO terms for all three GO ontologies.

225 Contrast of waveform duration identified 181 DEG and 40 enriched GO terms. 121 of the  
226 DEG were upregulated in the short EOD phenotype (Fig. 4A, purple lines). These genes were  
227 enriched with GO terms that include 'extracellular space,' 'extracellular region,' 'muscle  
228 contraction,' and 'phosphatidylinositol phosphorylation' (Fig. 4B, purple bars), whereas 61  
229 genes were upregulated in samples with long EODs (Fig. 4A, yellow lines). These genes were  
230 enriched with GO terms like 'negative regulation of cation transmembrane transport,' 'regulation

231 of voltage-gated calcium channel activity,’ and ‘neuropeptide hormone activity’ (Fig. 4B, yellow  
232 bars).

233 Contrast of waveform polarity identified 147 DEG and 35 enriched GO terms. We found  
234 40 upregulated genes (Fig. 5A, grey lines) in individuals with small penetrations. These genes  
235 were enriched with GO terms such as ‘response to mechanical stimulus,’ ‘extracellular matrix  
236 organization,’ and ‘collagen trimer’ (Fig. 5B, grey bars). In large penetrations phenotype, we  
237 found 107 upregulated genes (Fig. 5A, salmon lines). These genes were enriched with GO terms  
238 that included ‘sarcomere organization,’ ‘plasma membrane bounded cell projection  
239 morphogenesis,’ ‘calcium ion binding,’ and ‘structural constituent of cytoskeleton’ (Fig. 5B,  
240 salmon bars).

241 Finally, contrast of waveform complexity identified 174 DEG and 16 enriched GO terms.  
242 We detected 82 upregulated genes in individuals with biphasic EODs (Fig. 6A, blue lines). These  
243 genes were enriched with GO terms like ‘positive regulation of canonical Wnt signaling  
244 pathway,’ ‘mucopolysaccharide metabolic process,’ and ‘integral component of membrane’ (Fig.  
245 6B, blue bars). We detected 92 upregulated genes in individuals with triphasic EODs (Fig. 6A,  
246 orange lines). These genes were enriched with GO terms that included ‘cell-matrix adhesion,’  
247 ‘regulation of ion transmembrane transport,’ and ‘neuronal cell body’ (Fig. 6B, orange bars).

248 *Set C: Intersection of Phylogenetically Informative Comparisons and Expression Based*  
249 *Clustering*

250 We were motivated to obtain the DEGs and enriched GO terms that were most likely to  
251 be associated with divergent EOD phenotypes. To obtain this list, we constructed Set C, which is  
252 the intersection of Set A’ and Set B described above.

253 Contrast of waveform duration identified 105 DEG and 11 enriched GO terms. 79 of the  
254 DEG were upregulated in the short EOD phenotype, and 26 genes were upregulated in samples  
255 with long EODs. Contrast of waveform polarity identified 144 DEG and 9 enriched GO terms.  
256 We found 38 upregulated genes in individuals with small penetrations and 106 upregulated genes  
257 in individuals with large penetrations. Finally, contrast of waveform complexity identified 71  
258 DEG and 4 enriched GO terms. We detected 46 upregulated genes in individuals with biphasic  
259 EODs and 25 upregulated genes in individuals with triphasic EODs. These results are further  
260 detailed in Table 3. The enriched GO terms in Set C for Biological Process and Cellular  
261 Component are emphasized in boldface for waveform duration (Fig. 4B), polarity (Fig. 5B), and  
262 complexity (Fig. 6B). The individual genes in Set C are listed in Supplemental File 6 and their  
263 associated GO terms are listed in Supplemental File 7.

## 264 **Discussion**

265 It has long been recognized that changes in gene expression can affect phenotypic  
266 differences between species [18], and RNA-seq has facilitated the study of this relationship [19].  
267 The goal of this study was to determine DEGs associated with divergent EOD features within  
268 *Paramormyrops*. Expression patterns across all OTUs were highly correlated (Pearson's  $r > 0.89$ ,  
269 Fig. 3) and we detected differential expression of only 3,274 (16%) genes between any two  
270 OTUs. Thus, a major finding of this study is that EO gene expression is overall quite similar  
271 across *Paramormyrops* species with divergent EODs, and relatively few genes are associated  
272 with phenotypic differences in EOD waveform between OTUs. Given generally high levels of  
273 genetic distances observed between geographically proximate populations of these  
274 *Paramormyrops* species [35,75] this was a somewhat unexpected finding.

275           Despite the relatively small number of DEGs compared to the total number of genes  
276 expressed in the EO, we constructed our analysis to extract genes that were highly associated  
277 with particular phenotypes. Set A' represents a formal statistical test that contrasted OTUs. Each  
278 comparison contrasted samples from OTUs that were divergent in only one EOD feature, while  
279 minimizing phylogenetic distance. The tradeoff of this approach is small sample sizes without  
280 biological replication and potentially confounding variables, such as collection sites. Set B  
281 followed the opposite approach by minimizing the problem of biological replication at the  
282 expense of confounding phylogenetic relatedness and phenotypic heterogeneity. To mitigate this,  
283 we constructed Set C, which represents genes and GO terms that are differentially  
284 expressed/enriched between closely related OTUs divergent in only one phenotypic character  
285 and that are also consistently differentially expressed/enriched among representatives with  
286 similar EOD phenotypes. As such, we focus our discussion on the results of Set C. We classified  
287 the genes in Set C into “general” functional classes, or themes; and focus our attention on the  
288 ones that relate to the known morphological underpinnings of waveform duration (Table 4),  
289 polarity (Table 5), and complexity (Table 6). These functional classes were genes related to the  
290 ECM, cation homeostasis, lipid metabolism, and cytoskeletal and sarcomeric genes.

### 291 *Waveform Duration*

292           Several researchers have implicated the role of ion channels in the evolution of duration  
293 changes in mormyrid signals [53–57]. We did not find evidence of large changes in expression of  
294 potassium or sodium channels between short-duration *P. sp.* ‘SN3’ and other *Paramormyrops*  
295 species. We note that, while no differential expression of potassium or sodium channels was  
296 discovered, the GO term ‘regulation of voltage-gated calcium channel activity’ was enriched in  
297 long EOD phenotypes, although there were no genes annotated to this GO term common to the

298 lists of DEGs from Sets A' and B. In particular, individuals with short EODs upregulate two  
299 calcium-binding proteins: *parvalbumin-2*, and *parvalbumin-2-like*. Parvalbumins are highly  
300 expressed in skeletal muscle where they sequester calcium after contraction, thus facilitating  
301 relaxation. Frequently, muscles with fast relaxation rates express higher levels of parvalbumins  
302 [76]. The upregulated parvalbumin genes we detected may somehow be related to shorter EODs  
303 by sequestering calcium at a faster rate, which could affect action potentials directly or indirectly  
304 through calcium-activated ion channels.

305         Previous studies have demonstrated that changes in EOD duration result from changes in  
306 electrocyte ultrastructure. The two major phases of the EOD waveform are caused by action  
307 potentials generated by the anterior and posterior faces [47]. Bennett [48] demonstrated a  
308 relationship between EOD duration and increased surface membrane area, and Bass et al. [50]  
309 showed that differences in surface area are more readily noticeable on the anterior face.  
310 Membrane surface area is increased by folding the electrocyte membrane into papillae and other  
311 tube-like invaginations [77]. Testosterone can induce increases in EOD duration in several  
312 mormyrids [49,50,78,79], and it also increases membrane surface area, either particularly on the  
313 anterior face [50] or on both anterior and posterior faces [80]. A larger surface area may increase  
314 the capacitance of the membrane, thus delaying spike initiation [49,50]. Consequently, genes  
315 involved in the synthesis of membranes could influence EOD duration.

316         We found the most prominent differences in gene expression between the EOD duration  
317 phenotypes in genes that code for cytoskeletal, sarcomeric, and lipid metabolism proteins (Table  
318 4). We emphasize the last group: no lipid metabolism genes were upregulated in individuals with  
319 long EODs, whereas samples with short EODs upregulated *protein EFR3 homolog B-like* (a  
320 regulator of phosphatidylinositol 4-phosphate synthesis), *retinoic acid receptor responder*

321 *protein 3-like* (hydrolysis of phosphatidylcholines and phosphatidylethanolamines), *PTB*  
322 *domain-containing engulfment adapter protein 1-like* (modulates cellular glycosphingolipid and  
323 cholesterol transport), *phosphatidylinositol 3-kinase regulatory subunit gamma-like*, (PI3K,  
324 which phosphorylates phosphatidylinositol), and *proto-oncogene c-Fos-like* (can activate  
325 phospholipid synthesis), and showed enrichment of the GO term ‘phosphatidylinositol  
326 phosphorylation.’ We hypothesize that these genes are involved in the surface proliferation of the  
327 electrocytes membranes.

328           Additionally, each mormyrid electrocyte stands embedded in a gelatinous  
329 mucopolysaccharide matrix (the ECM) separated from neighboring electrocytes by connective  
330 tissue septa (Fig. 1) [34], and the membrane surface invaginations are coated by the same ECM  
331 that surrounds the electrocytes [50,77]. Hence, differences in surface invaginations could also be  
332 reflected in differences in the expression of genes whose products interact with the ECM. We  
333 detected none of these genes upregulated in individuals with long EODs, whereas those with  
334 short EODs upregulated three: *hyaluronidase-5-like* (breaks down hyaluronan), *collagenase 3-*  
335 *like* (plays a role in the degradation of ECM proteins), and *fibroblast growth factor binding*  
336 *protein 1* (acts as a carrier protein that releases fibroblast-binding factors from the ECM storage).

337           Overall, our results identify genes that may affect EOD duration through membrane  
338 rearrangements, which could be coupled with changes in the interaction with the ECM and the  
339 expression of cytoskeletal and sarcomeric genes. Since this waveform feature is modulated by  
340 testosterone, this androgen could facilitate the study of these suggested genetic underpinnings  
341 under more rigorously controlled circumstances.



342 *Waveform Polarity*

343           The number [47] and diameter [34,43] of stalk penetrations are positively correlated with  
344 the magnitude of P0. This phenomenon is exemplified by *P. sp.* ‘magnostipes type I’, which has  
345 the largest P0 in the OTUs examined in this study, giving the EOD the appearance that it  
346 ‘inverted’ relative to other EODs. This OTU has numerous, large diameter penetrations, whereas  
347 *P. kingsleyae* (P-type) has relatively fewer, small diameter penetrations (Fig. 1). These large  
348 structural differences may influence the electrocyte’s connection with the surrounding ECM, and  
349 our results support this: the phenotypes of waveform polarity exhibited differences in the  
350 expression of genes that interact with the extracellular space. We found no such genes  
351 upregulated in individuals with large penetrations, whereas in samples with small penetrations  
352 two GO terms were enriched: ‘extracellular matrix organization’ and ‘response to mechanical  
353 stimulus,’ and three genes were upregulated: *collagen alpha-1(I) chain-like*, *collagen alpha-1(X)*  
354 *chain-like*, and *hyaluronidase-5-like* (breaks down hyaluronan).

355           OTUs with large penetrations also exhibited higher expression of genes related to  
356 cytoskeletal, sarcomeric, and lipid metabolism proteins than do individuals with smaller  
357 penetrations (Table 5). This includes the GO terms ‘heart contraction,’ ‘sarcomerogenesis,’ and  
358 ‘cardiac myofibril assembly,’ representative of the genes *myosin XVB*, *heat shock protein HSP*  
359 *90-alpha 1* (has a role in myosin expression and assembly), *tubulin beta chain*, *tubulin beta 2A*  
360 *class IIa*, *fibroblast growth factor 13* (a microtubule-binding protein which directly binds tubulin  
361 and is involved in both polymerization and stabilization of microtubules), *spindle and*  
362 *kinetochore associated complex subunit 3* (a component of the kinetochore-microtubule  
363 interface), *troponin C*, *slow skeletal and cardiac muscles*, *protein tilB homolog* (may play a role  
364 in dynein arm assembly), and *cysteine and glycine rich protein 3* (codes for the Muscle LIM

365 Protein (MLP), which is implicated in various cytoskeletal and sarcomeric macromolecular  
366 complexes [81–83] and is a positive regulator of myogenesis [84]). In contrast, samples with  
367 small penetrations only show upregulation of the genes *myosin light chain 3-like* and *desmin-*  
368 *like*.

369 We hypothesize that the differences in the number and diameter of penetrations that drive  
370 variation in EOD waveform polarity require changes to the electrocyte's cytoskeletal and  
371 membrane properties. These arrangements may be necessary for the electrocytes body to adjust  
372 to the increased volume displacements imposed by larger penetrations; or alternatively, they may  
373 be a prerequisite for penetrating stalks to enlarge. Our observations support and elaborate on the  
374 hypothesis that sarcomeric proteins (which are non-contractile in mormyrids) may function as a  
375 means of cytoskeletal support and structural integrity in mormyrid electrocytes [85].

### 376 *Waveform Complexity*

377 Waveform complexity refers to the number of phases present in an EOD, and mormyrid  
378 EODs vary in the presence of a small head negative phase (P0). The presence or absence of P0 in  
379 the EOD depends on the anatomical configuration of the electrocytes: P0-present (or triphasic)  
380 EODs are produced by electrocytes that are innervated on the anterior face and have penetrating  
381 stalks (Pa), whereas P0-absent (or biphasic) EODs are produced by electrocytes innervated on  
382 the posterior face and lack penetrating stalks (NPP) [42,43,47,48,51,52]. Developmental studies  
383 of the adult EO suggest that Pa electrocytes go through a NPP stage before developing  
384 penetrations [86,87]. This motivated the hypothesis that penetrations develop by the migration of  
385 the posteriorly innervated stalk system (NPP stage) through the edge of the electrocyte, and that  
386 the interruption of this migration represents a mechanism for Pa-to-NPP reversals [88,89].

387 Our data indicates several DEGs that implicate specific cytoskeletal and ECM  
388 reorganizations between triphasic and biphasic EODs (Table 6). We observed differential  
389 expression of several genes associated with the polymerization of F-actin. In triphasic  
390 individuals, we observe upregulation of the gene *capping protein regulator and myosin 1 linker*  
391 *3* (CARMIL3); although this gene is little studied, its paralog CARMIL2 enhances F-actin  
392 polymerization. Also upregulated is the gene *cysteine and glycine rich protein 3* (MLP protein,  
393 see Waveform Polarity). In contrast, the biphasic phenotype upregulated the genes *protein-*  
394 *methionine sulfoxide oxidase mical2b-like* (promotes F-actin depolymerization), *transmembrane*  
395 *protein 47-like* (may regulate F-actin polymerization), *5'-AMP-activated protein kinase subunit*  
396 *gamma-2-like* (could remodel the actin cytoskeleton), and *FYVE, RhoGEF and PH domain-*  
397 *containing protein 4-like* (regulates the actin cytoskeleton). Thus, biphasic and triphasic EODs  
398 display several DEG, with potentially diverging outcomes, that influence the cellular internal  
399 structure.

400 We hypothesize that electrocytes with penetrating stalks (which produce triphasic EODs)  
401 require cytoskeletal arrangements to produce penetrations, perhaps related to increasing F-actin,  
402 to maintain their structural integrity. Similar to what we propose under waveform polarity, these  
403 arrangements may be necessary for the electrocyte body to adjust to the penetrations; or  
404 alternatively, they may be a prerequisite for penetrations to occur.

405 We also observed differential expression in a number of proteins expressed in the ECM.  
406 In biphasic OTUs, we found the GO term ‘mucopolysaccharide metabolic process’ to be  
407 enriched, and two upregulated copies of the gene *inter-alpha-trypsin inhibitor heavy chain 3*,  
408 which may act as a binding protein between hyaluronan and other ECM proteins. In triphasic  
409 individuals, we found the GO term ‘cell-matrix adhesion’ enriched, and the upregulated genes

410 *epiphycan-like*, which may play a role in cartilage matrix organization, and two copies of  
411 *ependymin-like* (these paralogs are ortholog to the zebrafish endymin-like gene *epdl2*).

412         The two endymin-like genes are among the most differentially expressed genes  
413 between biphasic and triphasic OTUs (500-fold more highly expressed in triphasic individuals in  
414 the comparison from Set A', Supplemental File 2). Although expressed in many tissues and with  
415 little amino acid similarity, all endymin-related proteins are secretory, calcium-binding  
416 glycoproteins that can undergo conformational changes and associate with collagen in the ECM.  
417 They have been involved in regeneration, nerve growth, cell contact, adhesion and migration  
418 processes [90]. We hypothesize that endymin-related proteins, and potentially some of the  
419 other ECM proteins highly expressed in triphasic individuals, are part of the “fibrillar substance”  
420 that lies between the stalk and the electrocyte body in individuals with penetrating electrocytes  
421 [50]. Notably, the *P. kingsleyae* genome assembly, which is based on a biphasic individual,  
422 contains three paralogs of *epdl2*, whereas the osteoglossiform *Scleropages formosus* only has  
423 one, suggesting the intriguing possibility that this gene may have been duplicated in  
424 *Paramormyrops* or in mormyrids. Endymin-related paralogs have been proposed as suitable  
425 targets to experimentally test gene subfunctionalization [91].

426         Altogether, our results for EOD waveform complexity suggest that the conformation of  
427 the cytoskeleton and the expression of proteins secreted to the ECM are important elements of  
428 the stalk penetrations, which generate triphasic EODs.

#### 429 *Concluding Remarks*

430         Two previous studies focused on DGE between EOs in another mormyrid species  
431 adaptive radiation/explosive diversification (genus *Campylomormyrus*). Both focused on

432 comparisons between the species *C. tshokwe* (long duration) and *C. compressirostris* (short  
433 duration). The first study performed a candidate gene approach to quantify the expression  
434 patterns of 18 sodium and potassium homeostasis genes between the EOs of the two species [55],  
435 whereas Lamanna et al. [92] used RNA-seq to simultaneously compare gene expression between  
436 EOs of these species. While we did not observe differences in expression of any of the potassium  
437 channels reported by Nagel et al. (2017), we note that Lamanna et al. (2015) reported differential  
438 expression of metabolic pathways related genes, particularly fatty acid metabolism, and ion  
439 transport and neuronal function (subcluster 4). While we found no overlap in the identities of any  
440 specific genes in our study, we note that our analysis also detected differential expression of lipid  
441 metabolism related genes when comparing EODs of different duration.

442         The widespread differential expression within *Paramormyrops* of calcium-related genes  
443 (Supplemental File 6) emphasizes a much-needed area of future research. Calcium is known to  
444 be necessary for the proper electrocyte repolarization in some gymnotiform species [93], but it  
445 may not be as important in others [94]. Few studies have addressed calcium physiology in  
446 mormyrids: calcium-related proteins have been reported as differentially expressed in EO vs  
447 skeletal muscle in *Campylomormyrus* [92] and in *Brienomyrus brachyistius* [85]. As electrocytes  
448 do not contract, calcium may act in electrocytes as an important second messenger or cofactor,  
449 participate in interactions with the ECM, and/or to contribute to the electrocyte's electrical  
450 properties through interaction with voltage gated ion channels.

451         A second notable pattern in our results is the unusual degree to which mormyrid  
452 electrocytes retain expression of some sarcomeric genes, which has been noted in several studies  
453 [58,85,92,95,96]. The role these proteins serves in electrocytes is presently unknown; however,  
454 results indicate that they are highly differentially expressed between *Paramormyrops* with

455 different EOD waveforms. This strongly suggests that sarcomeric proteins could play an  
456 important role in the conformational changes required to develop and sustain penetrations.

457 Finally, the biochemical composition and function of the ECM in electrocytes is poorly  
458 understood. Our analysis identifies differential expression in ECM-related genes across the  
459 *Paramormyrops*, associated with each of the three EOD features studied. At least two of these  
460 genes (*inter-alpha-trypsin inhibitor heavy chain 3* and *hyaluronidase-5-like*), distributed across  
461 all three EOD features, interact with hyaluronan. Hyaluronan is a type of mucopolysaccharide  
462 and a major component of some soft tissues and fluids [97]. Therefore, we propose that  
463 hyaluronan is an important constituent of the ECM in mormyrid fish. In addition, the electrocyte-  
464 ECM interactions should be an important area of future investigation, as they are likely to  
465 influence electrocyte shape, electrical properties, and potentially the morphology of penetrations  
466 and surface membrane invaginations.

467 To conclude, this study examined the expression correlates of a hyper-variable phenotype  
468 in a rapidly diversified genus of mormyrid electric fish. We examined DGE between taxa  
469 exhibiting variability along three major axes of variation that characterize EOD differences  
470 within *Paramormyrops* and among mormyrids: duration, polarity, and complexity. We found  
471 that gene expression in EOs among closely related species is largely similar, but patterns of DGE  
472 between EOs is primarily restricted to four broad functional sets: (1) cytoskeletal and sarcomeric  
473 proteins, (2) cation homeostasis, (3) lipid metabolism and (4) proteins that interact with the  
474 ECM. Our results suggest specific candidate genes that are likely to influence the size, shape and  
475 architecture of electrocytes for future research on gene function and molecular pathways that  
476 underlie EOD variation in mormyrid electric fish.

477 **Competing interests**

478 The authors declare they have no competing interests.

479 **Ethics approval and consent to participate**

480 All research protocols involving live fish were approved by the Michigan State University and  
481 Cornell University Institutional Animal Care and Use Committees.

482 **Acknowledgements**

483 This work was supported by the National Science Foundation (1455405: JRG, PI) and a grant  
484 from the Cornell University Center for Vertebrate Genomics. The authors thank Bruce Carlson,  
485 Matt Arnegard, Carl Hopkins, Roger Afene, Jean Danielle Mbega and Marie-Francois Eva for  
486 assistance with specimen collection in Gabon. The authors also acknowledge the Michigan State  
487 University Institute for Cyber-Enable Research for use of their high-performance computing  
488 infrastructure, and CENREST Gabon for logistical support and collection permits.

489 **Author Contributions**

490 JRG designed the experiment, collected and identified specimens, performed library construction  
491 and sequencing, and oversaw data analysis. ML performed QC analysis, designed and  
492 implemented the data analysis procedure, and performed examination of gene ontology and gene  
493 function. Both authors contributed to writing the manuscript.

494 **Supplementary Files**

495 **Supplementary File 1.** Raw reads NCBI SRA accession numbers, number of reads and  
496 alignment rates per sample, using bowtie 2 as the aligner and the *Paramormyrops kingsleyae* (N-  
497 type) genome as the reference.

498 **Supplementary File 2.** DEG per comparison from the 10 pairwise DGE analysis. Positive  
499 values under logFC indicate genes upregulated in the OTU under sampleA, whereas negative  
500 values correspond to genes upregulated in the OTU under sampleB. Values under each sample  
501 are gene raw counts. Significance threshold was  $\text{abs}(\log(\text{base2})\text{FC}) > 2$  (= 4-fold expression  
502 difference) and  $\text{FDR} < 0.001$ .

503 **Supplementary File 3.** Enriched GO terms per comparison, ontology and OTU in the DEG from  
504 the 10 pairwise comparisons. Also listed are the DEG annotated to each GO term. The pvalue is  
505 in the column weight01.

506 **Supplementary File 4.** DEG per EOD feature and phenotype identified with the Set B analysis.  
507 Values under each sample are TMM normalized,  $\log_2(\text{TMM} + 1)$  transformed, and mean-  
508 centered expression values.

509 **Supplementary File 5.** Enriched GO terms per EOD feature, ontology and phenotype in the  
510 DEG from the Set B analysis. Also listed are the DEG annotated to each GO term. The pvalue is  
511 in the column weight01.

512 **Supplementary File 6.** DEG in Set C, per EOD feature and phenotype.

513 **Supplementary File 7.** GO terms enriched in the DEG in Set C, per EOD feature, ontology and  
514 phenotype. Also listed are the DEG annotated to each GO term, and the quickGO definitions of  
515 each GO term.



516 **References**

517

518 1. Butlin R, Debelle A, Kerth C, Snook RR, Beukeboom LW, Castillo Cajas RF, et al. What do  
519 we need to know about speciation? *Trends Ecol Evol.* 2012;27:27–39.

520 2. Givnish TJ. Adaptive radiation versus “radiation” and “explosive diversification”: Why  
521 conceptual distinctions are fundamental to understanding evolution. *New Phytol.* 2015;207:297–  
522 303.

523 3. Grant RB, Grant PR. What Darwin’s Finches Can Teach Us about the Evolutionary Origin and  
524 Regulation of Biodiversity. *Bioscience.* 2003;53:965–75.

525 4. Kocher TD. Adaptive evolution and explosive speciation: The cichlid fish model. *Nat Rev*  
526 *Genet.* 2004;5:288–98.

527 5. Shaw KL. Further acoustic diversity in Hawaiian forests: two new species of Hawaiian cricket  
528 (Orthoptera: Gryllidae: Trigonidiinae: Laupala). *Zool J Linn Soc.* 2000;129:73–91.

529 6. Mullen SP, Mendelson TC, Schal C, Shaw KL. Rapid evolution of cuticular hydrocarbons in a  
530 species radiation of acoustically diverse Hawaiian crickets (Gryllidae: Trigonidiinae: Laupala).

531 *Evolution (N Y).* 2007;61:223–31.

532 7. Seehausen O. African cichlid fish: A model system in adaptive radiation research. *Proc R Soc*  
533 *B Biol Sci.* 2006;273:1987–98.

534 8. Hulsey CD. Cichlid genomics and phenotypic diversity in a comparative context. *Integr Comp*  
535 *Biol.* 2009;49:618–29.

- 536 9. Han F, Lamichhaney S, Grant BR, Grant PR, Andersson L, Webster MT. Gene flow, ancient  
537 polymorphism, and ecological adaptation shape the genomic landscape of divergence among  
538 Darwin's finches. *Genome Res.* 2017;27:1004–15.
- 539 10. Lamichhaney S, Berglund J, Almén MS, Maqbool K, Grabherr M, Martinez-Barrio A, et al.  
540 Evolution of Darwin's finches and their beaks revealed by genome sequencing. *Nature.* Nature  
541 Publishing Group, a division of Macmillan Publishers Limited. All Rights Reserved.;  
542 2015;518:371–5.
- 543 11. Lamichhaney S, Han F, Berglund J, Wang C, Almén MS, Webster MT, et al. A beak size  
544 locus in Darwin's finches facilitated character displacement during a drought. *Science.*  
545 2016;352:470–4.
- 546 12. O'Quin CT, Drilea AC, Roberts RB, Kocher TD. A Small Number of Genes Underlie Male  
547 Pigmentation Traits in Lake Malawi Cichlid Fishes. *J Exp Zool Part B Mol Dev Evol.*  
548 2012;318:199–208.
- 549 13. Magalhaes IS, Seehausen O. Genetics of male nuptial colour divergence between sympatric  
550 sister species of a Lake Victoria cichlid fish. *J Evol Biol.* John Wiley & Sons, Ltd (10.1111);  
551 2010;23:914–24.
- 552 14. Shaw KL, Lesnick SC. Genomic linkage of male song and female acoustic preference QTL  
553 underlying a rapid species radiation. *Proc Natl Acad Sci. National Academy of Sciences;*  
554 2009;106:9737–42.
- 555 15. Wiley C, Ellison CK, Shaw KL. Widespread genetic linkage of mating signals and  
556 preferences in the Hawaiian cricket *Laupala*. *Proc R Soc B Biol Sci. The Royal Society;*

557 2012;279:1203–9.

558 16. Blankers T, Oh KP, Bombarely A, Shaw KL. The Genomic Architecture of a Rapid Island  
559 Radiation: Recombination Rate Variation, Chromosome Structure, and Genome Assembly of the  
560 Hawaiian Cricket *Laupala*. *Genetics*. *Genetics*; 2018;209:1329–44.

561 17. Ding B, Daugherty DW, Husemann M, Chen M, Howe AE, Danley PD. Quantitative genetic  
562 analyses of male color pattern and female mate choice in a pair of cichlid fishes of Lake Malawi,  
563 East Africa. *PLoS One*. 2014;9:1–22.

564 18. King MC, Wilson AC. Evolution at two levels in humans and chimpanzees. *Science*.  
565 1975;188:107–16.

566 19. Alvarez M, Schrey AW, Richards CL. Ten years of transcriptomics in wild populations:  
567 What have we learned about their ecology and evolution? *Mol Ecol*. 2015;24:710–25.

568 20. Brawand D, Soumillon M, Necsulea A, Julien P, Csárdi G, Harrigan P, et al. The evolution  
569 of gene expression levels in mammalian organs. *Nature*. 2011;478:343–8.

570 21. Ferreira PG, Patalano S, Chauhan R, Ffrench-Constant R, Gabaldón T, Guigó R, et al.  
571 Transcriptome analyses of primitively eusocial wasps reveal novel insights into the evolution of  
572 sociality and the origin of alternative phenotypes. *Genome Biol*. 2013;14:R20.

573 22. Abolins-Abols M, Kornobis E, Ribeca P, Wakamatsu K, Peterson MP, Ketterson ED, et al.  
574 Differential gene regulation underlies variation in melanic plumage coloration in the dark-eyed  
575 junco (*Junco hyemalis*). *Mol Ecol*. 2018;4501–15.

576 23. Härer A, Meyer A, Torres-Dowdall J. Convergent phenotypic evolution of the visual system  
577 via different molecular routes: How Neotropical cichlid fishes adapt to novel light environments.

- 578 Evol Lett. 2018;341–54.
- 579 24. Nigenda-Morales SF, Hu Y, Beasley JC, Ruiz-Piña HA, Valenzuela-Galván D, Wayne RK.  
580 Transcriptomic analysis of skin pigmentation variation in the Virginia opossum (*Didelphis*  
581 *virginiana*). *Mol Ecol*. 2018;27:2680–97.
- 582 25. Young RL, Ferkin MH, Ockendon-Powell NF, Orr VN, Phelps SM, Pogány Á, et al.  
583 Conserved transcriptomic profiles underpin monogamy across vertebrates. *Proc Natl Acad Sci*.  
584 2019;116:201813775.
- 585 26. Jeukens J, Renaut S, St-Cyr J, Nolte AW, Bernatchez L. The transcriptomics of sympatric  
586 dwarf and normal lake whitefish (*Coregonus clupeaformis* spp., Salmonidae) divergence as  
587 revealed by next-generation sequencing. *Mol Ecol*. 2010;19:5389–403.
- 588 27. Giorello FM, Feijoo M, D’Elía G, Naya DE, Valdez L, Opazo JC, et al. An association  
589 between differential expression and genetic divergence in the Patagonian olive mouse (*Abrothrix*  
590 *olivacea*). *Mol Ecol*. 2018;27:3274–86.
- 591 28. Carlson BA, Hasan SM, Hollmann M, Miller DB, Harmon LJ, Arnegard ME. Brain  
592 evolution triggers increased diversification of electric fishes. *Science*. 2011;332:583–6.
- 593 29. Rabosky DL, Santini F, Eastman J, Smith SA, Sidlauskas B, Chang J, et al. Rates of  
594 speciation and morphological evolution are correlated across the largest vertebrate radiation. *Nat*  
595 *Commun*. 2013;4:1–8.
- 596 30. Sullivan JP, Lavoué S, Hopkins CD. Discovery and phylogenetic analysis of a riverine  
597 species flock of African electric fishes (Mormyridae: Teleostei). *Evolution*. 2002;56:597–616.
- 598 31. Sullivan JP, Lavoué S, Arnegard ME, Hopkins CD. AFLPs resolve phylogeny and reveal

- 599 mitochondrial introgression within a species flock of African electric fish (Mormyroidea:  
600 Teleostei). *Evolution*. 2004;58:825–41.
- 601 32. Lavoué S, Arnegard ME, Sullivan JP, Hopkins CD. Petrocephalus of Odzala offer insights  
602 into evolutionary patterns of signal diversification in the Mormyridae, a family of weakly  
603 electrogenic fishes from Africa. *J Physiol Paris*. 2008;102:322–39.
- 604 33. Hopkins CD. On the diversity of electric signals in a community of mormyrid electric fish in  
605 West Africa. *Am Zool*. Oxford University Press; 1981;21:211–22.
- 606 34. Bass AH. Species differences in electric organs of mormyrids: Substrates for species-typical  
607 electric organ discharge waveforms. *J Comp Neurol*. 1986;244:313–30.
- 608 35. Arnegard ME, Bogdanowicz SM, Hopkins CD. Multiple cases of striking genetic similarity  
609 between alternate electric fish signal morphs in sympatry. *Evolution*. 2005;59:324–43.
- 610 36. Sullivan JP, Lavoué S, Hopkins CD. Molecular systematics of the African electric fishes  
611 (Mormyroidea: teleostei) and a model for the evolution of their electric organs. *J Exp Biol*.  
612 2000;203:665–83.
- 613 37. Arnegard ME, McIntyre PB, Harmon LJ, Zelditch ML, Crampton WGR, Davis JK, et al.  
614 Sexual signal evolution outpaces ecological divergence during electric fish species radiation. *Am*  
615 *Nat*. 2010;176:335–56.
- 616 38. Lissmann HW, Machin KE. The mechanism of object location in *Gymnarchus niloticus* and  
617 similar fish. *J Exp Biol*. 1958;35:451–486.
- 618 39. von der Emde G, Amey M, Engelmann J, Fetz S, Folde C, Hollmann M, et al. Active  
619 electrolocation in *Gnathonemus petersii*: Behaviour, sensory performance, and receptor systems.

- 620 J Physiol - Paris. Elsevier Ltd; 2008;102:279–90.
- 621 40. Kramer B. Electric organ discharge interaction during interspecific agonistic behaviour in  
622 freely swimming mormyrid fish. J Comp Physiol. Springer-Verlag; 1974;93:203–35.
- 623 41. Möhres FP. Elektrische Entladungen im Dienste der Revierabgrenzung bei Fischen.  
624 Naturwissenschaften. Springer-Verlag; 1957;44:431–2.
- 625 42. Hopkins CD. Signal evolution in electric communication. In: Hauser M, Konishi M, editors.  
626 Des Anim Commun. Cambridge, MA: MIT Press; 1999. p. 461– 491.
- 627 43. Gallant JR, Arnegard ME, Sullivan JP, Carlson BA, Hopkins CD. Signal variation and its  
628 morphological correlates in *Paramormyrops kingsleyae* provide insight into the evolution of  
629 electrogenic signal diversity in mormyrid electric fish. J Comp Physiol A. 2011;197:799–817.
- 630 44. Carlson BA. Electric signaling behavior and the mechanisms of electric organ discharge  
631 production in mormyrid fish. J Physiol. 2002;96:405–19.
- 632 45. Caputi AA, Carlson BA, Macadar O. Electric Organs and Their Control. In: Bullock TH,  
633 Hopkins C.D., Popper A.N., Fay R.R., editors. Electroreception. Springer H. New York, NY:  
634 Springer Handbook of Auditory Research, vol 21; 2005. p. 410–51.
- 635 46. Hopkins CD. Behavior of Mormyridae. In: Bullock TH, Heiligenberg W, editors.  
636 Electroreception. New York: Wiley; 1986. p. 527–76.
- 637 47. Bennett MVL, Grundfest H. Studies on the morphology and electrophysiology of electric  
638 organs. III. Electrophysiology of electric organs in mormyrids. In: Chagas C, de Carvalho A,  
639 editors. Bioelectrogenesis. Amsterdam: Elsevier; 1961. p. 113–35.

- 640 48. Bennett MVL. Electric Organs. In: Hoar WS, Randall DJ, editors. *Fish Physiol*. London:  
641 Academic Press; 1971. p. 347–491.
- 642 49. Bass AH, Volman SF. From behavior to membranes: testosterone-induced changes in action  
643 potential duration in electric organs. *Proc Natl Acad Sci*. 1987;84:9295–8.
- 644 50. Bass AH, Denizot J-P, Marchaterre MA. Ultrastructural features and hormone-dependent sex  
645 differences of mormyrid electric organs. *J Comp Neurol*. 1986;254:511–28.
- 646 51. Szabo T. Les Organes Electriques des Mormyrides. In: Chagas C, de Carvalho A, editors.  
647 *Bioelectrogenesis*. New York: Elsevier; 1961. p. 20–4.
- 648 52. Carlson BA, Gallant JR. From sequence to spike to spark: evo-devo-neuroethology of  
649 electric communication in mormyrid fishes. *J Neurogenet*. 2013;27:106–29.
- 650 53. Zakon HH, Lu Y, Zwickl D, Hillis DM. Sodium channel genes and the evolution of diversity  
651 in communication signals of electric fishes: convergent molecular evolution. *Proc Natl Acad Sci*  
652 U S A. 2006;103:3675–80.
- 653 54. Arnegard ME, Zwickl DJ, Lu Y, Zakon HH. Old gene duplication facilitates origin and  
654 diversification of an innovative communication system--twice. *Proc Natl Acad Sci U S A*.  
655 2010;107:22172–7.
- 656 55. Nagel R, Kirschbaum F, Tiedemann R. Electric organ discharge diversification in mormyrid  
657 weakly electric fish is associated with differential expression of voltage-gated ion channel genes.  
658 *J Comp Physiol A Neuroethol Sensory, Neural, Behav Physiol*. Springer Berlin Heidelberg;  
659 2017;203:183–95.
- 660 56. Swapna I, Ghezzi A, York JM, Markham MR, Halling DB, Lu Y, et al. Electrostatic Tuning

- 661 of a Potassium Channel in Electric Fish. *Curr Biol. Cell Press*; 2018;28:2094–2102.e5.
- 662 57. Paul C, Kirschbaum F, Mamonekene V, Tiedemann R. Evidence for Non-neutral Evolution  
663 in a Sodium Channel Gene in African Weakly Electric Fish (*Campylomormyrus*, *Mormyridae*). *J*  
664 *Mol Evol. Springer New York LLC*; 2016;83:61–77.
- 665 58. Gallant JR, Losilla M, Tomlinson C, Warren WC. The Genome and Adult Somatic  
666 Transcriptome of the Mormyrid Electric Fish *Paramormyrops kingsleyae*. *Genome Biol Evol.*  
667 *Oxford University Press*; 2017;9:3525–30.
- 668 59. Arnegard ME, Jackson BS, Hopkins CD. Time-domain signal divergence and discrimination  
669 without receptor modification in sympatric morphs of electric fishes. *J Exp Biol.*  
670 2006;209:2182–98.
- 671 60. Bolger AM, Lohse M, Usadel B. Trimmomatic: a flexible trimmer for Illumina sequence  
672 data. *Bioinformatics.* 2014;30:2114–20.
- 673 61. MacManes MD. On the optimal trimming of high-throughput mRNA sequence data. *Front*  
674 *Genet.* 2014;5:1–7.
- 675 62. Langmead B, Salzberg SL. Fast gapped-read alignment with Bowtie 2. *Nat Methods. Nature*  
676 *Publishing Group*; 2012;9:357–9.
- 677 63. Li B, Dewey CN. RSEM: accurate transcript quantification from RNA-Seq data with or  
678 without a reference genome. *BMC Bioinformatics. BioMed Central*; 2011;12:323.
- 679 64. Grabherr MG, Haas BJ, Yassour M, Levin JZ, Thompson DA, Amit I, et al. Full-length  
680 transcriptome assembly from RNA-Seq data without a reference genome. *Nat Biotechnol. Nature*  
681 *Publishing Group, a division of Macmillan Publishers Limited. All Rights Reserved.;*



- 682 2011;29:644–52.
- 683 65. Haas BJ, Papanicolaou A, Yassour M, Grabherr M, Blood PD, Bowden J, et al. De novo  
684 transcript sequence reconstruction from RNA-seq using the Trinity platform for reference  
685 generation and analysis. *Nat Protoc.* Nature Publishing Group, a division of Macmillan  
686 Publishers Limited. All Rights Reserved.; 2013;8:1494–512.
- 687 66. Robinson MD, Oshlack A. A scaling normalization method for differential expression  
688 analysis of RNA-seq data. *Genome Biol.* 2010;11:R25.
- 689 67. Ashburner M, Ball CA, Blake JA, Botstein D, Butler H, Cherry JM, et al. Gene Ontology:  
690 tool for the unification of biology. *Nat Genet.* 2000;25:25–9.
- 691 68. The Gene Ontology Consortium. The Gene Ontology Resource: 20 years and still GOing  
692 strong. *Nucleic Acids Res.* 2019;47:D330–8.
- 693 69. Camacho C, Coulouris G, Avagyan V, Ma N, Papadopoulos J, Bealer K, et al. BLAST+:  
694 architecture and applications. *BMC Bioinformatics.* BioMed Central; 2009;10:421.
- 695 70. Wu C, MacLeod I, Su AI. BioGPS and MyGene.info: Organizing online, gene-centric  
696 information. *Nucleic Acids Res.* Oxford University Press; 2013;41:D561–5.
- 697 71. Xin J, Mark A, Afrasiabi C, Tsueng G, Juchler M, Gopal N, et al. High-performance web  
698 services for querying gene and variant annotation. *Genome Biol.* BioMed Central; 2016;17:91.
- 699 72. Alexa A, Rahnenführer J, Lengauer T. Improved scoring of functional groups from gene  
700 expression data by decorrelating GO graph structure. *Bioinformatics.* Oxford University Press;  
701 2006;22:1600–7.

- 702 73. Binns D, Dimmer E, Huntley R, Barrell D, O'Donovan C, Apweiler R. QuickGO: A web-  
703 based tool for Gene Ontology searching. *Bioinformatics*. Oxford University Press;  
704 2009;25:3045–6.
- 705 74. The UniProt Consortium. UniProt: a worldwide hub of protein knowledge. *Nucleic Acids*  
706 *Res*. 2019;47:D506–15.
- 707 75. Gallant JR, Sperling J, Cheng C, Arnegard ME, Carlson BA, Hopkins CD.  
708 Microevolutionary processes underlying macroevolutionary patterns of electric signal diversity  
709 in mormyrid fish. *bioRxiv.org*. Cold Spring Harbor Laboratory; 2017;154047.
- 710 76. Wilwert JL, Madhoun, Nisreen M, Coughlin DJ. Parvalbumin correlates with relaxation rate  
711 in the swimming muscle of sheepshead and kingfish. *J Exp Biol*. 2006;209:227–37.
- 712 77. Schwartz IR, Pappas GD, Bennett MVL. The fine structure of electrocytes in weakly electric  
713 teleosts. *J Neurocytol*. 1975;4:87–114.
- 714 78. Bass AH, Hopkins CD. Hormonal control of sexual differentiation: changes in electric organ  
715 discharge waveform. *Science*. 1983;220:971–4.
- 716 79. Bass AH, Hopkins CD. Hormonal control of sex differences in the electric organ discharge  
717 (EOD) of mormyrid fishes. *J Comp Physiol A*. 1985;156:587–604.
- 718 80. Freedman EG, Olyarchuk J, Marchaterre MA, Bass AH. A temporal analysis of testosterone-  
719 induced changes in electric organs and electric organ discharges of mormyrid fishes. *J*  
720 *Neurobiol*. 1989;20:619–34.
- 721 81. Vafiadaki E, Arvanitis DA, Papalouka V, Terzis G, Roumeliotis TI, Spengos K, et al. Muscle  
722 lim protein isoform negatively regulates striated muscle actin dynamics and differentiation.

- 723 FEBS J. John Wiley & Sons, Ltd (10.1111); 2014;281:3261–79.
- 724 82. Papalouka V, Arvanitis DA, Vafiadaki E, Mavroidis M, Papadodima SA, Spiliopoulou CA,  
725 et al. Muscle LIM protein interacts with cofilin 2 and regulates F-actin dynamics in cardiac and  
726 skeletal muscle. *Mol Cell Biol. American Society for Microbiology Journals*; 2009;29:6046–58.
- 727 83. Louis HA, Pino JD, Schmeichel KL, Pomiès P, Beckerle MC. Comparison of three members  
728 of the cysteine-rich protein family reveals functional conservation and divergent patterns of gene  
729 expression. *J Biol Chem. American Society for Biochemistry and Molecular Biology*;  
730 1997;272:27484–91.
- 731 84. Arber S, Halder G, Caroni P. Muscle LIM protein, a novel essential regulator of myogenesis,  
732 promotes myogenic differentiation. *Cell. Elsevier*; 1994;79:221–31.
- 733 85. Gallant JR, Hopkins CD, Deitcher DL. Differential expression of genes and proteins between  
734 electric organ and skeletal muscle in the mormyrid electric fish *Brienomyrus brachyistius*. *J Exp*  
735 *Biol.* 2012;215:2479–94.
- 736 86. Szabo T. Development of the Electric Organ of Mormyridae. *Nature. Nature Publishing*  
737 *Group*; 1960;188:760–2.
- 738 87. Denizot JP, Kirschbaum F, Westby GWM, Tsuji S. On the development of the adult electric  
739 organ in the mormyrid fish *Pollimyrus isidori* (with special focus on the innervation). *J*  
740 *Neurocytol.* 1982;11:913–34.
- 741 88. Alves-Gomes J, Hopkins CD. Molecular insights into the phylogeny of mormyrid form fishes  
742 and the evolution of their electric organs. *Brain Behav Evol.* 1997;49:324–50.
- 743 89. Hopkins CD. Design features for electric communication. *J Exp Biol. Co Biol*;

- 744 1999;202:1217–28.
- 745 90. Ganss B, Hoffmann W. Calcium-induced conformational transition of trout ependymins  
746 monitored by tryptophan fluorescence. *Open Biochem J.* 2009;3:14–7.
- 747 91. Suárez-Castillo EC, García-Arrarás JE. Molecular evolution of the ependymin protein  
748 family: a necessary update. *BMC Evol Biol.* 2007;7:23.
- 749 92. Lamanna F, Kirschbaum F, Waurick I, Dieterich C, Tiedemann R. Cross-tissue and cross-  
750 species analysis of gene expression in skeletal muscle and electric organ of African weakly-  
751 electric fish (Teleostei; Mormyridae). *BMC Genomics.* BMC Genomics; 2015;16:668.
- 752 93. Bartels E. Depolarization of electroplax membrane in calcium-free Ringer's solution. *J*  
753 *Membr Biol.* 1971;5:121–32.
- 754 94. Ferrari MB, Zakon HH. Conductances contributing to the action-potential of *Sternopygus*  
755 *electrocytes.* *J Comp Physiol A-sensory neural Behav Physiol.* UNIV TEXAS,CTR DEV  
756 *BIOL,PATTERSON LAB,AUSTIN,TX 78712: Springer; 1993;173:281–92.*
- 757 95. Gallant JR, Traeger LL, Volkening JD, Moffett H, Chen P-H, Novina CD, et al. Genomic  
758 basis for the convergent evolution of electric organs. *Science.* 2014;344:1522–5.
- 759 96. Lamanna F, Kirschbaum F, Tiedemann R. De novo assembly and characterization of the  
760 skeletal muscle and electric organ transcriptomes of the African weakly electric fish  
761 *Campylomormyrus compressirostris* (Mormyridae, Teleostei). *Mol Ecol Resour.* 2014;14:1222–  
762 30.
- 763 97. Fraser JRE, Laurent TC, Laurent UBG. Hyaluronan: its nature, distribution, functions and  
764 turnover. *J Intern Med.* John Wiley & Sons, Ltd (10.1111); 1997;242:27–33.

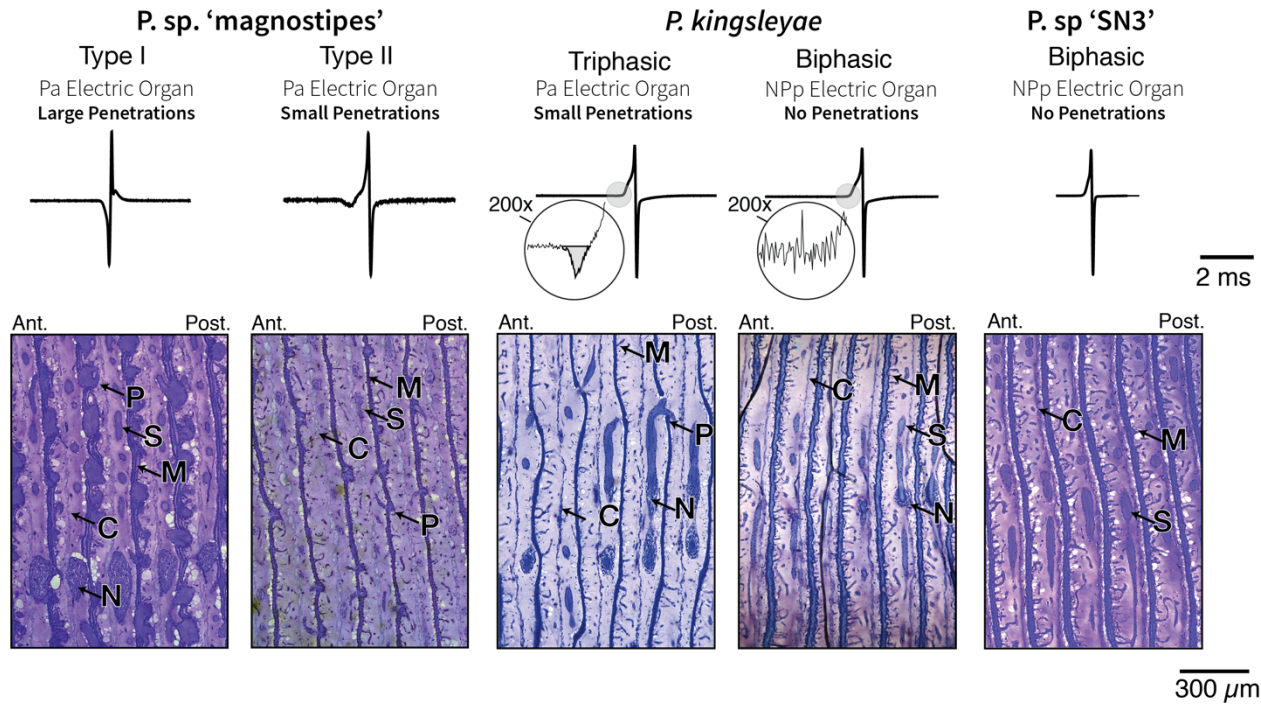

Figure 1. Electric organ discharge (EOD) diversity and electric organ anatomy in *Paramormyrops*. EOD traces from specimens in this study and representative parasagittal sections of the five *Paramormyrops* operational taxonomic units (OTUs) considered in this study. 200x magnification on *P. kingsleyae* EODs reveals a P0 phase on triphasic EODs only. Individuals with triphasic EODs all have penetrations, whereas individuals with biphasic EODs do not. OTUs with ‘inverted’ polarity triphasic EODs have large penetrations compared to OTUs with normal polarity triphasic EODs. Ant. = anterior, C = connective tissue septa, N = nerve, M = microstalklets (profusely branched stalks), P = penetrations, Post. = posterior, S = stalks.

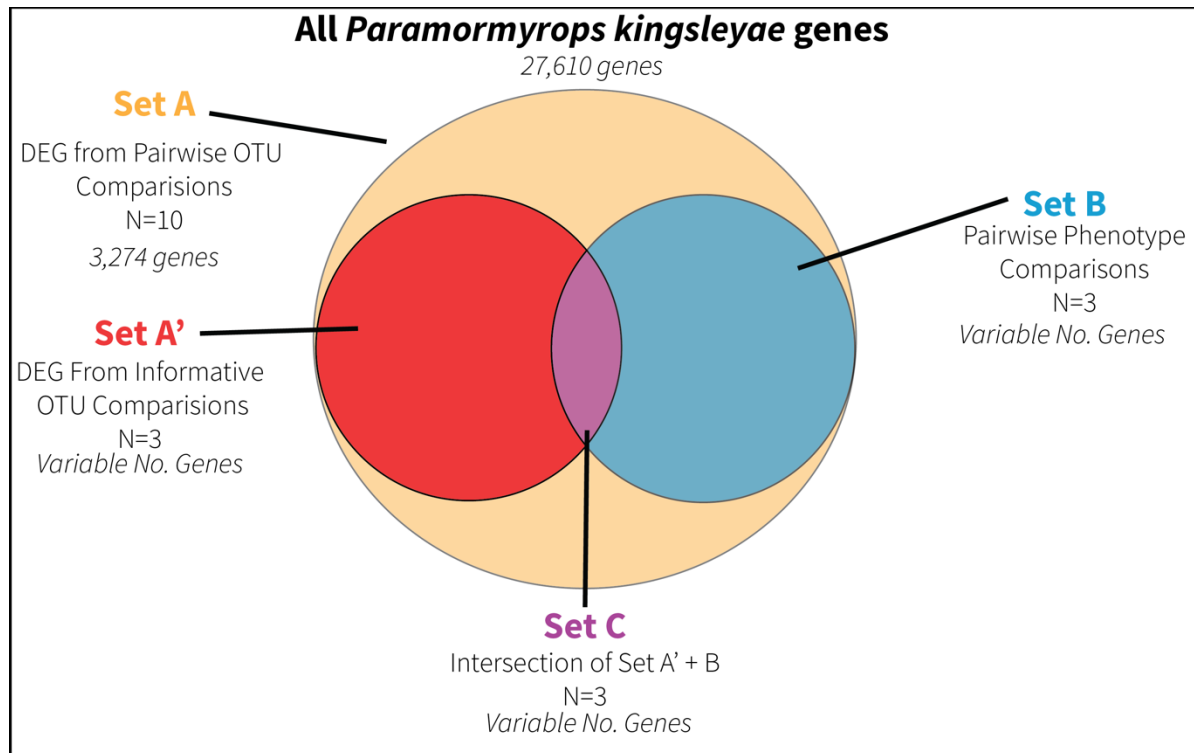

Figure 2. Diagram of how we constructed the lists of upregulated genes of Set C. We used the same approach to find the respective enriched GO terms. DEG = differentially expressed genes, N = number of comparisons made for each set, OTU = operational taxonomic unit.

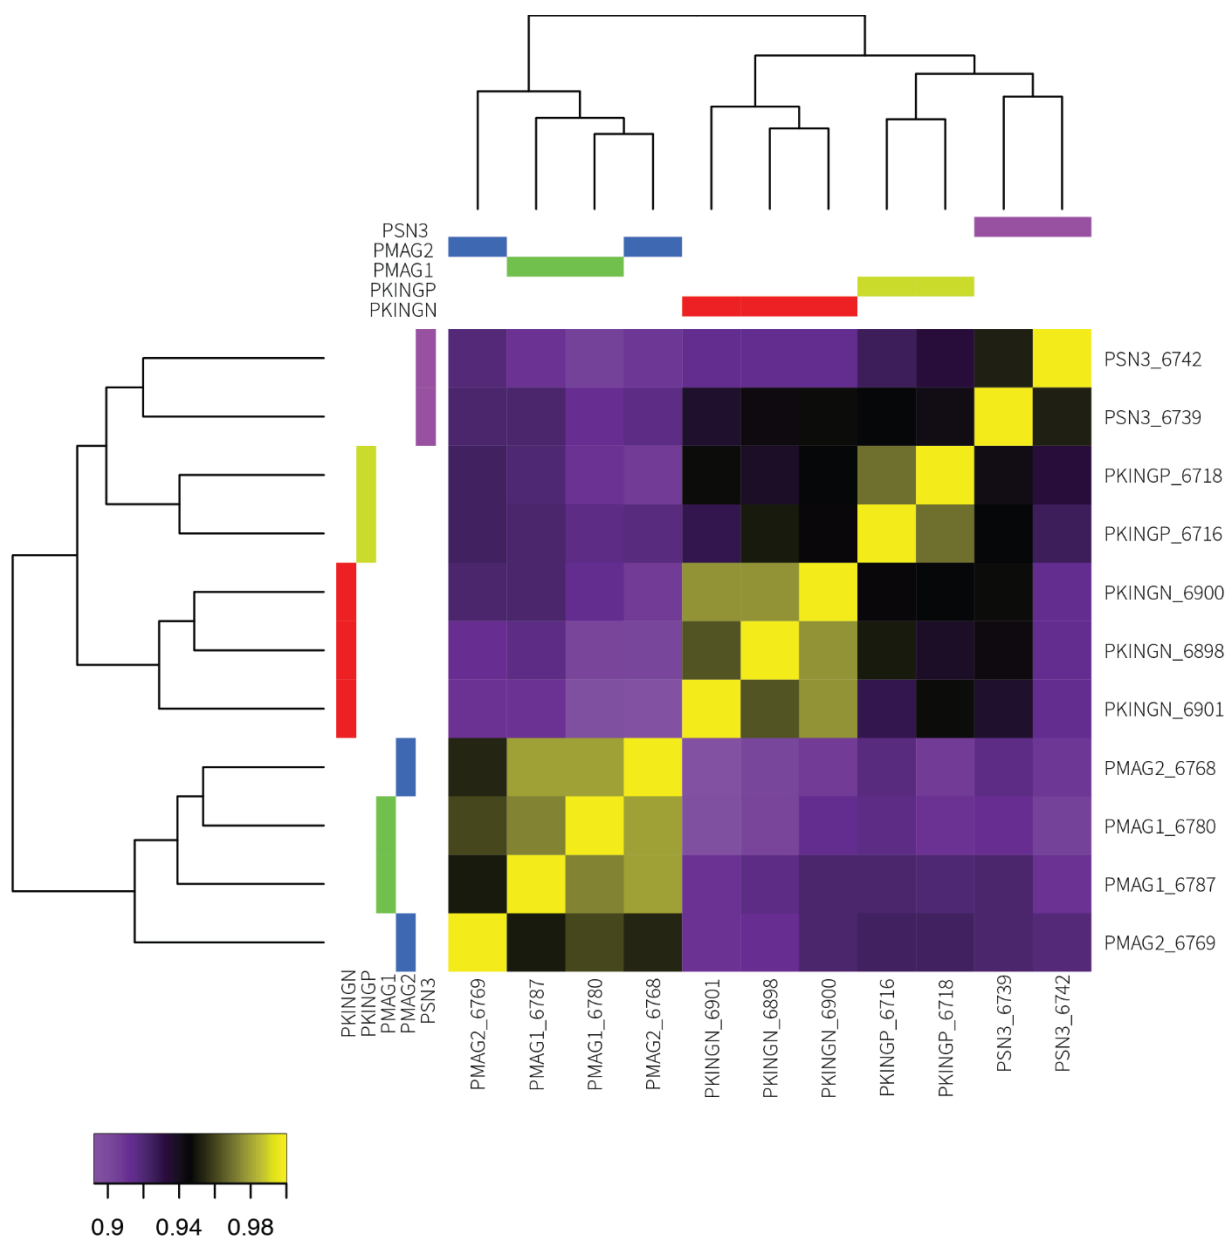

Figure 3. Heatmap of sample by sample correlations in gene expression, and the inferred phylogenetic relationships from these expression correlation values.

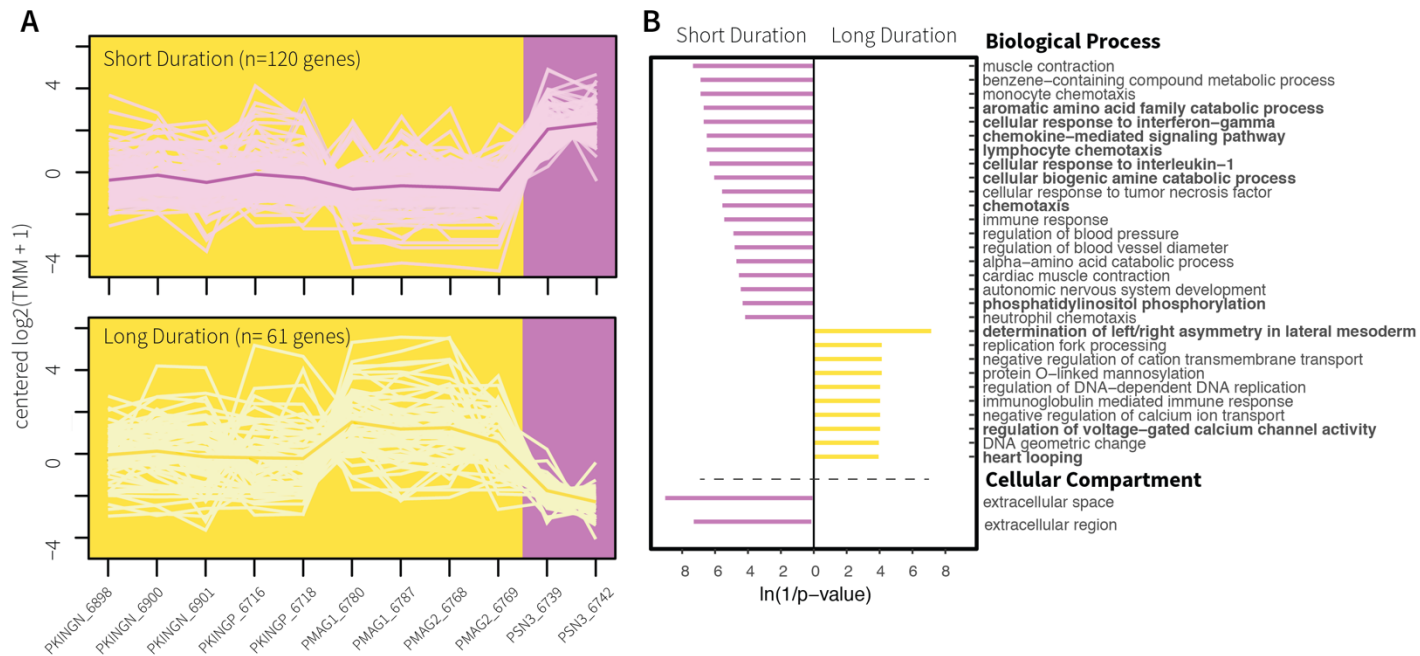

Figure 4. A) Gene clusters whose expression patterns correlate with the electric organ discharge (EOD) duration phenotypes short EODs (purple background) and long EODs (yellow background). Samples are sorted alphabetically on the X axis. The lines connect transformed gene expression values across all samples; light-color lines represent one gene, the dark-color line is the average expression pattern of all genes in the cluster. B) Gene Ontology (GO) terms for Biological Process and Cellular Component found enriched in the gene clusters from (A). The X axis shows transformed p-values, the longer a bar the smaller its p-value. The direction and color of a bar indicate the phenotype in which the GO term is enriched [same color code as (A)]. GO terms highlighted in bold also belong to Set C.



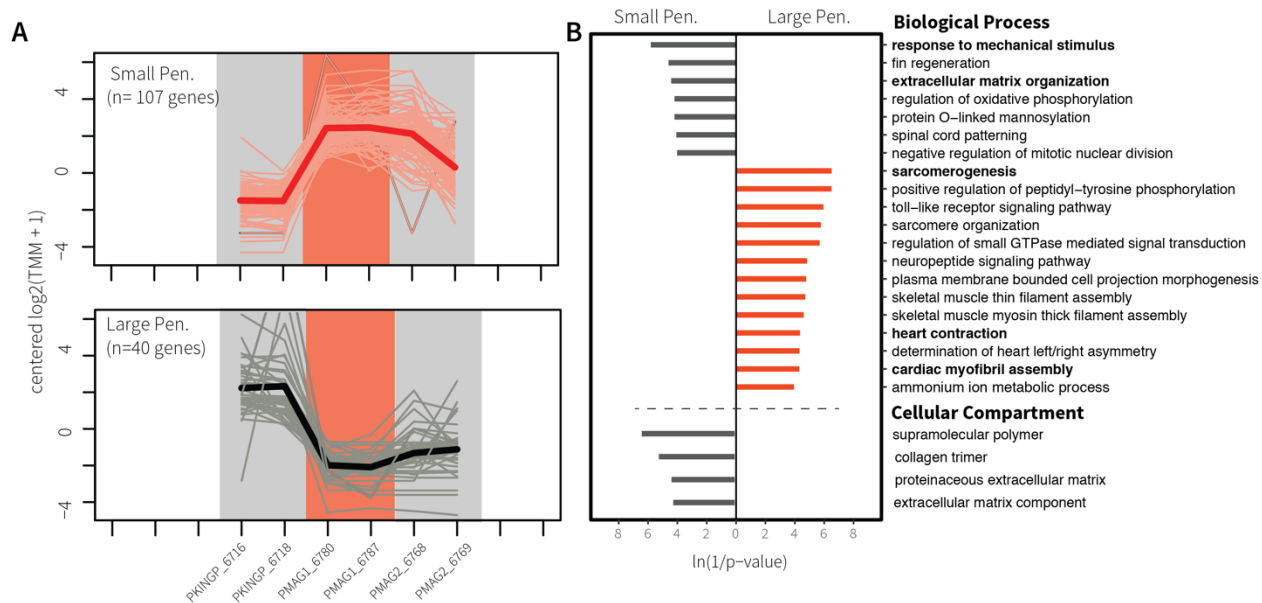

Figure 5. A) Gene clusters whose expression patterns correlate with the electric organ discharge (EOD) waveform polarity phenotypes small penetrations (grey background) and large penetrations (salmon background). Samples are sorted alphabetically on the X axis, but only samples with penetrations are considered for this EOD feature. The lines connect transformed gene expression values across all samples; light-color lines represent one gene, the dark-color line is the average expression pattern of all genes in the cluster. B) Gene Ontology (GO) terms for Biological Process and Cellular Component found enriched in the gene clusters from (A). The X axis shows transformed p-values, the longer a bar the smaller its p-value. The direction and color of a bar indicate the phenotype in which the GO term is enriched [same color code as (A)]. GO terms highlighted in bold also belong to Set C. Pen = penetrations.

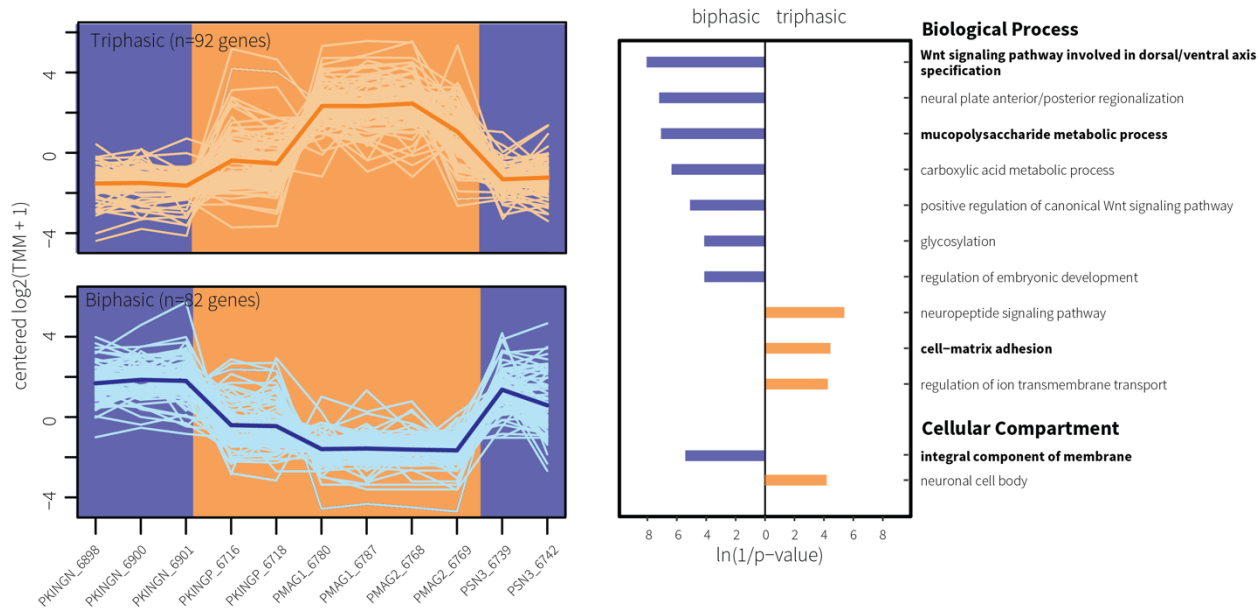

Figure 6. A) Gene clusters whose expression patterns correlate with the electric organ discharge (EOD) waveform complexity phenotypes biphasic (blue background) and triphasic (orange background). Samples are sorted alphabetically on the X axis. The lines connect transformed gene expression values across all samples; light-color lines represent one gene, the dark-color line is the average expression pattern of all genes in the cluster. B) Gene Ontology (GO) terms for Biological Process and Cellular Component found enriched in the gene clusters from (A). The X axis shows transformed p-values, the longer a bar the smaller its p-value. The direction and color of a bar indicate the phenotype in which the GO term is enriched [same color code as (A)]. GO terms highlighted in bold also belong to Set C.

Table 1. Phenotypic and collection information of the samples studied.

| Tag No.     | OTU                                 | Phenotypes per EOD feature |            |                                     | CUMV<br>Accession<br>Number | Site Name         | Lat,<br>Long    | SL<br>(mm) | Sex |
|-------------|-------------------------------------|----------------------------|------------|-------------------------------------|-----------------------------|-------------------|-----------------|------------|-----|
|             |                                     | Duration                   | Complexity | Polarity (diameter of penetrations) |                             |                   |                 |            |     |
| PKINGN_6898 | <i>P. kingsleyae</i> (N-type)       | long EOD                   | biphasic   | NA (no penetrations)                | 95184                       | Bikagala<br>Creek | -2.20,<br>11.56 | 131        | M   |
| PKINGN_6900 | <i>P. kingsleyae</i> (N-type)       | long EOD                   | biphasic   | NA (no penetrations)                | 95184                       | Bikagala<br>Creek | -2.20,<br>11.56 | 145        | M   |
| PKINGN_6901 | <i>P. kingsleyae</i> (N-type)       | long EOD                   | biphasic   | NA (no penetrations)                | 95184                       | Bikagala<br>Creek | -2.20,<br>11.56 | 149        | M   |
| PKINGP_6716 | <i>P. kingsleyae</i> (P-type)       | long EOD                   | triphasic  | small penetrations                  | 95183                       | Mouvanga<br>Creek | -2.33,<br>11.69 | 92.5       | J/F |
| PKINGP_6718 | <i>P. kingsleyae</i> (P-type)       | long EOD                   | triphasic  | small penetrations                  | 95183                       | Mouvanga<br>Creek | -2.33,<br>11.69 | 91         | J/F |
| PMAG1_6780  | <i>P. sp.</i> 'magnostipes type I'  | long EOD                   | triphasic  | large penetrations                  | 95155                       | Mouvanga<br>Creek | -2.33,<br>11.69 | 107        | M   |
| PMAG1_6787  | <i>P. sp.</i> 'magnostipes type I'  | long EOD                   | triphasic  | large penetrations                  | 95155                       | Mouvanga<br>Creek | -2.33,<br>11.69 | 97.5       | F   |
| PMAG2_6768  | <i>P. sp.</i> 'magnostipes type II' | long EOD                   | triphasic  | small penetrations                  | 95155                       | Mouvanga<br>Creek | -2.33,<br>11.69 | 93         | M   |
| PMAG2_6769  | <i>P. sp.</i> 'magnostipes type II' | long EOD                   | triphasic  | small penetrations                  | 95155                       | Mouvanga<br>Creek | -2.33,<br>11.69 | 124        | M   |
| PSN3_6739   | <i>P. sp.</i> 'SN3'                 | short EOD                  | biphasic   | NA (no penetrations)                | Uncatalogued                | Mouvanga<br>Creek | -2.33,<br>11.69 | 73         | J/F |
| PSN3_6742   | <i>P. sp.</i> 'SN3'                 | short EOD                  | biphasic   | NA (no penetrations)                | 95173                       | Mouvanga<br>Creek | -2.33,<br>11.69 | 70         | J/F |

CUMV = Cornell University Museum of Vertebrates, EOD = electric organ discharge, F= female, J = juvenile, Lat = Latitude, Long = Longitude, M = male, NA = not applicable, OTU = operational taxonomic unit, SL = standard length

Table 2. All ten possible pairwise DGE comparisons with the total number of DEG and enriched GO terms for each. Also indicated is whether each comparison is informative for contrasting each EOD feature. The phenotypes for waveform polarity can only be contrasted in comparisons where both OTUs have penetrations. Informative comparisons for each EOD feature (Set A') are marked with an \* in the column of the EOD feature they contrasted.

| Comparison                          |                                     | Contrast |            |          | DEG genes | enriched GO terms |    |    |
|-------------------------------------|-------------------------------------|----------|------------|----------|-----------|-------------------|----|----|
| OTU #1                              | OTU #2                              | Duration | Complexity | Polarity |           | BP                | CC | MF |
| <i>P. kingsleyae</i> (N-type)       | <i>P. kingsleyae</i> (P-type)       | no       | yes*       | NA (no)  | 530       | 46                | 12 | 17 |
| <i>P. kingsleyae</i> (N-type)       | <i>P. sp.</i> 'magnostipes type I'  | no       | yes        | NA (no)  | 1542      | 76                | 15 | 37 |
| <i>P. kingsleyae</i> (N-type)       | <i>P. sp.</i> 'magnostipes type II' | no       | yes        | NA (no)  | 1174      | 71                | 16 | 25 |
| <i>P. kingsleyae</i> (N-type)       | <i>P. sp.</i> 'SN3'                 | yes*     | no         | NA (no)  | 507       | 52                | 4  | 13 |
| <i>P. kingsleyae</i> (P-type)       | <i>P. sp.</i> 'magnostipes type I'  | no       | no         | yes*     | 1322      | 40                | 12 | 25 |
| <i>P. kingsleyae</i> (P-type)       | <i>P. sp.</i> 'magnostipes type II' | no       | no         | no       | 719       | 47                | 10 | 24 |
| <i>P. kingsleyae</i> (P-type)       | <i>P. sp.</i> 'SN3'                 | yes      | yes        | NA (no)  | 385       | 33                | 3  | 14 |
| <i>P. sp.</i> 'magnostipes type I'  | <i>P. sp.</i> 'magnostipes type II' | no       | no         | yes      | 9         | 5                 | 1  | 1  |
| <i>P. sp.</i> 'magnostipes type I'  | <i>P. sp.</i> 'SN3'                 | yes      | yes        | NA (no)  | 1053      | 43                | 6  | 27 |
| <i>P. sp.</i> 'magnostipes type II' | <i>P. sp.</i> 'SN3'                 | yes      | yes        | NA (no)  | 489       | 40                | 9  | 16 |

BP = biological process, CC = cellular component, DEG = differentially expressed genes, DGE = differential gene expression, GO = gene ontology, NA = not applicable, MF = molecular function, OTU = operational taxonomic unit

Table 3. Total number of upregulated genes and enriched GO terms in Set C for each EOD feature, phenotype and ontology.

| EOD feature | Phenotype          | Upregulated genes | Protein-coding (%) | enriched GO terms |    |    |
|-------------|--------------------|-------------------|--------------------|-------------------|----|----|
|             |                    |                   |                    | BP                | CC | MF |
| Duration    | short EODs         | 79                | 65 (82)            | 8                 | 0  | 0  |
| Duration    | long EODs          | 26                | 21 (81)            | 3                 | 0  | 0  |
| Polarity    | small penetrations | 38                | 28 (74)            | 2                 | 0  | 1  |
| Polarity    | large penetrations | 106               | 87 (82)            | 3                 | 0  | 3  |
| Complexity  | biphasic           | 46                | 34 (74)            | 2                 | 1  | 0  |
| Complexity  | triphasic          | 25                | 23 (92)            | 1                 | 0  | 0  |

BP = biological process, CC = cellular component, EOD = electric organ discharge, GO = gene ontology, MF = molecular function.

Table 4. Selected DEG in Set C for waveform duration by “general” functional class and EOD phenotype, and highlights of their predicted function.

| Pking_Entrez_geneID | Pking_gene_name                                                | Pking_gene_symbol | “general” functional class | upregulated in phenotype | Highlights of Predicted Function (edited from UniProt)                                                                                                                                                                                                                                 |
|---------------------|----------------------------------------------------------------|-------------------|----------------------------|--------------------------|----------------------------------------------------------------------------------------------------------------------------------------------------------------------------------------------------------------------------------------------------------------------------------------|
| 111832799           | <i>stathmin domain containing 1</i>                            | <i>stmnd1</i>     | Cytoskeletal & sarcomeric  | long EODs                | GO MF: tubulin binding; GO BP: microtubule depolymerization, regulation of cytoskeleton organization                                                                                                                                                                                   |
| 111833088           | <i>myosin-7-like</i>                                           | LOC111833088      | Cytoskeletal & sarcomeric  | long EODs                | Myosins are actin-based motor molecules with ATPase activity essential for muscle contraction                                                                                                                                                                                          |
| 111856289           | <i>pleckstrin homology-like domain family B member 1</i>       | LOC111856289      | Cytoskeletal & sarcomeric  | long EODs                | GO BP: regulation of microtubule cytoskeleton organization                                                                                                                                                                                                                             |
| 111842483           | <i>parvalbumin-2</i>                                           | LOC111842483      | Cytoskeletal & sarcomeric  | short EODs               | In muscle, parvalbumin is thought to be involved in relaxation after contraction. It binds two calcium ions                                                                                                                                                                            |
| 111846153           | <i>troponin I, slow skeletal muscle-like</i>                   | LOC111846153      | Cytoskeletal & sarcomeric  | short EODs               | Inhibitory subunit of troponin, the thin filament regulatory complex which confers calcium-sensitivity to striated muscle actomyosin ATPase activity                                                                                                                                   |
| 111856036           | <i>parvalbumin-2-like</i>                                      | LOC111856036      | Cytoskeletal & sarcomeric  | short EODs               | In muscle, parvalbumin is thought to be involved in relaxation after contraction. It binds two calcium ions                                                                                                                                                                            |
| 111860236           | <i>tropomyosin alpha-1 chain-like</i>                          | LOC111860236      | Cytoskeletal & sarcomeric  | short EODs               | Binds to actin filaments in muscle and non-muscle cells. Plays a central role, in association with the troponin complex, in the calcium dependent regulation of vertebrate striated muscle contraction. In non-muscle cells is implicated in stabilizing cytoskeleton actin filaments. |
| 111833641           | <i>hyaluronidase-5-like</i>                                    | LOC111833641      | Extracellular matrix       | short EODs               | Catalyzes the hydrolysis of hyaluronan into smaller oligosaccharide fragments                                                                                                                                                                                                          |
| 111837392           | <i>fibroblast growth factor binding protein 1</i>              | <i>fgfbp1</i>     | Extracellular matrix       | short EODs               | Acts as a carrier protein that releases fibroblast-binding factors (FGFs) from the extracellular matrix (EM) storage and thus enhance the mitogenic activity of FGFs                                                                                                                   |
| 111860877           | <i>collagenase 3-like</i>                                      | LOC111860877      | Extracellular matrix       | short EODs               | Plays a role in the degradation of extracellular matrix proteins                                                                                                                                                                                                                       |
| 111834720           | <i>protein EFR3 homolog B-like</i>                             | LOC111834720      | Lipid metabolism           | short EODs               | Component of a complex required to localize phosphatidylinositol 4-kinase (PI4K) to the plasma membrane. The complex acts as a regulator of phosphatidylinositol 4-phosphate (PtdIns4P) synthesis                                                                                      |
| 111840357           | <i>PTB domain-containing engulfment adapter protein 1-like</i> | LOC111840357      | Lipid metabolism           | short EODs               | Modulates cellular glycosphingolipid and cholesterol transport                                                                                                                                                                                                                         |

|           |                                                                    |              |                  |            |                                                                                                                                    |
|-----------|--------------------------------------------------------------------|--------------|------------------|------------|------------------------------------------------------------------------------------------------------------------------------------|
| 111846286 | <i>retinoic acid receptor responder protein 3-like</i>             | LOC111846286 | Lipid metabolism | short EODs | Catalyzes the calcium-independent hydrolysis of acyl groups in various phosphatidylcholines (PC) and phosphatidylethanolamine (PE) |
| 111847640 | <i>phosphatidylinositol 3-kinase regulatory subunit gamma-like</i> | LOC111847640 | Lipid metabolism | short EODs | Binds to activated (phosphorylated) protein-tyrosine kinases through its SH2 domain and regulates their kinase activity            |
| 111852518 | <i>proto-oncogene c-Fos-like</i>                                   | LOC111852518 | Lipid metabolism | short EODs | In growing cells, activates phospholipid synthesis, possibly by activating CDS1 and PI4K2A                                         |

BP = biological process, DEG = differentially expressed genes, EOD = electric organ discharge, GO = gene ontology, MF = molecular function.

Table 5. Selected DEG in Set C for waveform polarity, by “general” functional class and EOD phenotype, and highlights of their expected function.

| Pking_Entrez_geneID | Pking_gene_name                                                  | Pking_gene_symbol | “general” functional class | upregulated in phenotype | Highlights of Predicted Function (edited from UniProt)                                                                                                                                                                                                                                       |
|---------------------|------------------------------------------------------------------|-------------------|----------------------------|--------------------------|----------------------------------------------------------------------------------------------------------------------------------------------------------------------------------------------------------------------------------------------------------------------------------------------|
| 111838673           | <i>Kv channel-interacting protein 1-like</i>                     | LOC111838673      | Cation homeostasis         | Large penetrations       | Regulatory subunit of Kv4/D (Shal)-type voltage-gated rapidly inactivating A-type potassium channels. Regulates channel density, inactivation kinetics and rate of recovery from inactivation in a calcium-dependent and isoform-specific manner.                                            |
| 111843424           | <i>potassium voltage-gated channel subfamily C member 2-like</i> | LOC111843424      | Cation homeostasis         | Large penetrations       | Voltage-gated potassium channel that mediates transmembrane potassium transport in excitable membranes, primarily in the brain. Contributes to the regulation of the fast action potential repolarization and in sustained high-frequency firing in neurons of the central nervous system    |
| 111849794           | <i>extracellular calcium-sensing receptor-like</i>               | LOC111849794      | Cation homeostasis         | Small penetrations       | G-protein-coupled receptor that senses changes in the extracellular concentration of calcium ions and plays a key role in maintaining calcium homeostasis. The activity of this receptor is mediated by a G-protein that activates a phosphatidylinositol-calcium second messenger system    |
| 111853690           | <i>protein kinase cGMP-dependent 1</i>                           | <i>prkg1</i>      | Cation homeostasis         | Small penetrations       | Serine/threonine protein kinase. Numerous protein targets for PRKG1 phosphorylation are implicated in modulating cellular calcium. Proteins that are phosphorylated by PRKG1 regulate platelet activation and adhesion, smooth muscle contraction, cardiac function, gene expression.        |
| 111833185           | <i>myosin XVB</i>                                                | <i>myo15b</i>     | Cytoskeletal & sarcomeric  | Large penetrations       | Unknown, due to the absence of a functional motor domain                                                                                                                                                                                                                                     |
| 111837476           | <i>troponin C, slow skeletal and cardiac muscles</i>             | LOC111837476      | Cytoskeletal & sarcomeric  | Large penetrations       | Troponin is the central regulatory protein of striated muscle contraction. The binding of calcium troponin abolishes its inhibitory action on actin filaments                                                                                                                                |
| 111837614           | <i>spindle and kinetochore associated complex subunit 3</i>      | <i>ska3</i>       | Cytoskeletal & sarcomeric  | Large penetrations       | Component of the SKA1 complex, which is a direct component of the kinetochore-microtubule interface and directly associates with microtubules as oligomeric assemblies                                                                                                                       |
| 111847443           | <i>cysteine and glycine rich protein 3</i>                       | <i>csr3</i>       | Cytoskeletal & sarcomeric  | Large penetrations       | Positive regulator of myogenesis. Plays a crucial and specific role in the organization of cytosolic structures in cardiomyocytes. It is essential for calcineurin anchorage to the Z line. Can directly bind to actin filaments. Isoform 2 may play a role in early sarcomere organization. |
| 111848724           | <i>protein tilB homolog</i>                                      | LOC111848724      | Cytoskeletal & sarcomeric  | Large penetrations       | May play a role in dynein arm assembly                                                                                                                                                                                                                                                       |



|           |                                                           |               |                           |                    |                                                                                                                                                                                                                             |
|-----------|-----------------------------------------------------------|---------------|---------------------------|--------------------|-----------------------------------------------------------------------------------------------------------------------------------------------------------------------------------------------------------------------------|
| 111850126 | <i>tubulin beta 2A class Iia</i>                          | <i>tubb2a</i> | Cytoskeletal & sarcomeric | Large penetrations | Tubulin is the major constituent of microtubules                                                                                                                                                                            |
| 111852410 | <i>heat shock protein HSP 90-alpha 1</i>                  | LOC111852410  | Cytoskeletal & sarcomeric | Large penetrations | Plays a key role in slow and fast muscle development in the embryo. Plays a role in myosin expression and assembly                                                                                                          |
| 111853965 | <i>tubulin beta chain</i>                                 | LOC111853965  | Cytoskeletal & sarcomeric | Large penetrations | Tubulin is the major constituent of microtubules                                                                                                                                                                            |
| 111859691 | <i>fibroblast growth factor 13</i>                        | LOC111859691  | Cytoskeletal & sarcomeric | Large penetrations | Microtubule-binding protein which directly binds tubulin and is involved in both polymerization and stabilization of microtubules                                                                                           |
| 111834243 | <i>desmin-like</i>                                        | LOC111834243  | Cytoskeletal & sarcomeric | Small penetrations | Muscle-specific type III intermediate filament essential for proper muscular structure and function. Plays a crucial role in maintaining the structure of sarcomeres. May act as a sarcomeric microtubule-anchoring protein |
| 111856797 | <i>myosin light chain 3-like</i>                          | LOC111856797  | Cytoskeletal & sarcomeric | Small penetrations | Regulatory light chain of myosin. Does not bind calcium.                                                                                                                                                                    |
| 111833641 | <i>hyaluronidase-5-like</i>                               | LOC111833641  | Extracellular matrix      | Small penetrations | Catalyzes the hydrolysis of hyaluronan into smaller oligosaccharide fragments                                                                                                                                               |
| 111848653 | <i>collagen alpha-1(I) chain-like</i>                     | LOC111848653  | Extracellular matrix      | Small penetrations | Type I collagen is a member of group I collagen (fibrillar forming collagen)                                                                                                                                                |
| 111857875 | <i>collagen alpha-1(X) chain-like</i>                     | LOC111857875  | Extracellular matrix      | Small penetrations | Type X collagen is a product of hypertrophic chondrocytes and has been localized to presumptive mineralization zones of hyaline cartilage                                                                                   |
| 111833176 | <i>phospholipid-transporting ATPase IA</i>                | LOC111833176  | Lipid metabolism          | Large penetrations | Involved in the transport of aminophospholipids from the outer to the inner leaflet of various membranes and ensures the maintenance of asymmetric distribution of phospholipids                                            |
| 111833450 | <i>low-density lipoprotein receptor-like</i>              | LOC111833450  | Lipid metabolism          | Large penetrations | Binds LDL, the major cholesterol-carrying lipoprotein of plasma, and transports it into cells by endocytosis                                                                                                                |
| 111844857 | <i>ectonucleotide pyrophosphatase/phosphodiesterase 2</i> | <i>enpp2</i>  | Lipid metabolism          | Large penetrations | Hydrolyzes lysophospholipids to produce the signaling molecule lysophosphatidic acid (LPA) in extracellular fluids. Acts as an angiogenic factor by stimulating migration of smooth muscle cells and microtubule formation. |
| 111845574 | <i>phospholipase A2-like</i>                              | LOC111845574  | Lipid metabolism          | Large penetrations | PA2 catalyzes the calcium-dependent hydrolysis of the 2-acyl groups in 3-sn-phosphoglycerides, this releases glycerophospholipids and arachidonic acid that serve as the precursors of signal molecules.                    |
| 111847497 | <i>peroxiredoxin-6-like</i>                               | LOC111847497  | Lipid metabolism          | Large penetrations | It has phospholipase activity                                                                                                                                                                                               |

|           |                                                 |              |                  |                    |                                                                                                                |
|-----------|-------------------------------------------------|--------------|------------------|--------------------|----------------------------------------------------------------------------------------------------------------|
| 111855292 | <i>long-chain-fatty-acid--CoA ligase 4-like</i> | LOC111855292 | Lipid metabolism | Large penetrations | Activation of long-chain fatty acids for both synthesis of cellular lipids, and degradation via beta-oxidation |
| 111853114 | <i>alkaline ceramidase 2-like</i>               | LOC111853114 | Lipid metabolism | Small penetrations | Hydrolyzes the sphingolipid ceramide into sphingosine and free fatty acid                                      |

DEG = differentially expressed genes, EOD = electric organ discharge.

Table 6. Selected DEG in Set C for waveform complexity, by “general” functional class and EOD phenotype, and highlights of their expected function.

| Pking_Entrez_geneID | Pking_gene_name                                               | Pking_gene_symbol | “general” functional class | upregulated in phenotype | Highlights of Predicted Function (edited from UniProt)                                                                                                                                                                                                                                      |
|---------------------|---------------------------------------------------------------|-------------------|----------------------------|--------------------------|---------------------------------------------------------------------------------------------------------------------------------------------------------------------------------------------------------------------------------------------------------------------------------------------|
| 111838181           | <i>solute carrier family 9 member A7</i>                      | <i>slc9a7</i>     | Cation homeostasis         | Biphasic                 | Protein: Sodium/hydrogen exchanger 7. Gene: SLC9A7. Mediates electroneutral exchange of protons for Na <sup>+</sup> and K <sup>+</sup> across endomembranes                                                                                                                                 |
| 111838015           | <i>chloride intracellular channel protein 2-like</i>          | LOC111838015      | Cation homeostasis         | Triphasic                | Can insert into membranes and form chloride ion channels. Inhibits calcium influx                                                                                                                                                                                                           |
| 111848312           | <i>voltage-dependent calcium channel gamma-1 subunit-like</i> | LOC111848312      | Cation homeostasis         | Triphasic                | Regulatory subunit of the voltage-gated calcium channel that gives rise to L-type calcium currents in skeletal muscle. Regulates channel inactivation kinetics                                                                                                                              |
| 111845832           | <i>5'-AMP-activated protein kinase subunit gamma-2-like</i>   | LOC111845832      | Cytoskeletal & sarcomeric  | Biphasic                 | AMP/ATP-binding subunit of AMP-activated protein kinase (AMPK). Acts as a regulator of cellular polarity by remodeling the actin cytoskeleton; probably by indirectly activating myosin                                                                                                     |
| 111850616           | <i>transmembrane protein 47-like</i>                          | LOC111850616      | Cytoskeletal & sarcomeric  | Biphasic                 | Regulates cell junction organization in epithelial cells. May regulate F-actin polymerization                                                                                                                                                                                               |
| 111851223           | <i>FYVE, RhoGEF and PH domain-containing protein 4-like</i>   | LOC111851223      | Cytoskeletal & sarcomeric  | Biphasic                 | Plays a role in regulating the actin cytoskeleton and cell shape                                                                                                                                                                                                                            |
| 111857398           | <i>protein-methionine sulfoxide oxidase mical2b-like</i>      | LOC111857398      | Cytoskeletal & sarcomeric  | Biphasic                 | Promotes depolymerization of F-actin                                                                                                                                                                                                                                                        |
| 111847443           | <i>cysteine and glycine rich protein 3</i>                    | <i>csrp3</i>      | Cytoskeletal & sarcomeric  | Triphasic                | Positive regulator of myogenesis. Plays a crucial and specific role in the organization of cytosolic structures in cardiomyocytes. It is essential for calcineurin anchorage to the Z line. Can directly bind to actin filaments. Isoform 2 may play a role in early sarcomere organization |
| 111854588           | <i>capping protein regulator and myosin 1 linker 3</i>        | <i>carmil3</i>    | Cytoskeletal & sarcomeric  | Triphasic                | No info for CARMIL3, but CARMIL2 is a cell membrane-cytoskeleton-associated protein that plays a role in the regulation of actin polymerization at the barbed end of actin filaments. Enhances actin polymerization                                                                         |

|           |                                                          |              |                      |           |                                                                                                                           |
|-----------|----------------------------------------------------------|--------------|----------------------|-----------|---------------------------------------------------------------------------------------------------------------------------|
| 111841398 | <i>inter-alpha-trypsin inhibitor heavy chain 3</i>       | <i>itih3</i> | Extracellular matrix | Biphasic  | May act as a carrier of hyaluronan in serum or as a binding protein between hyaluronan and other matrix proteins          |
| 111841399 | <i>inter-alpha-trypsin inhibitor heavy chain H3-like</i> | LOC111841399 | Extracellular matrix | Biphasic  | May act as a carrier of hyaluronan in serum or as a binding protein between hyaluronan and other matrix proteins          |
| 111853010 | <i>ependymin-like</i>                                    | LOC111853010 | Extracellular matrix | Triphasic | GO MF: calcium ion binding. GO BP: cell-matrix adhesion                                                                   |
| 111853027 | <i>ependymin-like</i>                                    | LOC111853027 | Extracellular matrix | Triphasic | GO MF: calcium ion binding. GO BP: cell-matrix adhesion                                                                   |
| 111853814 | <i>epiphycan-like</i>                                    | LOC111853814 | Extracellular matrix | Triphasic | May have a role in bone formation and also in establishing the ordered structure of cartilage through matrix organization |

BP = biological process, DEG = differentially expressed genes, EOD = electric organ discharge, GO = gene ontology, MF = molecular function
